# Supplementary material for: Reprogramming of the Developmental Program of Rhus javanica During Initial Stage of Gall Induction by Schlechtendalia chinensis
Source: Front Plant Sci. 2020 May 15;11:471. doi: 10.3389/fpls.2020.00471 (PMC7243852; doi:10.3389/fpls.2020.00471)
Supplement: TABLE S3 — Transcriptome sequencing and summary statics of de novo assembly. [file Table_3.XLSX]

## Sheet: Sheet1
		Raw assembled contigs	filtered contigs (B. j referense transcript contigs)
	Number of contigs	265145	142488
	N50	1842	2267
	Medain length	414	875
	Average length	905.3	1331.87
	Table S2. Transcriptome sequencing and summary statics of de novo assembly.
