# Supplementary material for: Reprogramming of the Developmental Program of Rhus javanica During Initial Stage of Gall Induction by Schlechtendalia chinensis
Source: Front Plant Sci. 2020 May 15;11:471. doi: 10.3389/fpls.2020.00471 (PMC7243852; doi:10.3389/fpls.2020.00471)
Supplement: TABLE S6 — Result of GO enrichment analysis of up-regulated gens in gall of R. javanica. [file Table_6.XLSX]

## Sheet: Sheet1
GO biological process complete	REFLIST (27581)	Number of genes (1540)	Fold Enrichment	P-value			GO biological process	AGI code	Gene name	function
photosynthesis, light harvesting in photosystem I (GO:0009768)	24	22	16.42	4.46E-13			photosynthesis, light harvesting in photosystem I (GO:0009768)	AT3G27690	CHLOROPHYLL A-B BINDING PROTEIN 2.4, CHLOROPLASTIC (PTHR21649:SF91)	LHCB2, LHCB2.3, LHCB2.4, LIGHT-HARVESTING CHLOROPHYLL B-BINDING 2, PHOTOSYSTEM II LIGHT HARVESTING COMPLEX GENE 2.3
protein-chromophore linkage (GO:0018298)	28	21	13.43	3.45E-11			photosynthesis, light harvesting in photosystem I (GO:0009768)	AT2G40100	CHLOROPHYLL A-B BINDING PROTEIN CP29.3, CHLOROPLASTIC (PTHR21649:SF83)	LHCB4.3, LHCB8, LIGHT HARVESTING COMPLEX PHOTOSYSTEM II
photosynthesis, light harvesting in photosystem II (GO:0009769)	10	7	12.54	3.77E-02			photosynthesis, light harvesting in photosystem I (GO:0009768)	ATCG00340	PHOTOSYSTEM I P700 CHLOROPHYLL A APOPROTEIN A2 (PTHR30128:SF46)	PSAB
response to low light intensity stimulus (GO:0009645)	19	10	9.43	3.58E-03			photosynthesis, light harvesting in photosystem I (GO:0009768)	AT3G47470	CHLOROPHYLL A-B BINDING PROTEIN 4, CHLOROPLASTIC (PTHR21649:SF4)	CAB4, LHCA4, LIGHT-HARVESTING CHLOROPHYLL-PROTEIN COMPLEX I SUBUNIT A4
carbon fixation (GO:0015977)	20	9	8.06	3.28E-02			photosynthesis, light harvesting in photosystem I (GO:0009768)	AT5G54270	CHLOROPHYLL A-B BINDING PROTEIN 3, CHLOROPLASTIC (PTHR21649:SF7)
xylan biosynthetic process (GO:0045492)	35	12	6.14	1.16E-02			photosynthesis, light harvesting in photosystem I (GO:0009768)	AT3G08940	CHLOROPHYLL A-B BINDING PROTEIN CP29.2, CHLOROPLASTIC (PTHR21649:SF71)
chlorophyll biosynthetic process (GO:0015995)	37	12	5.81	1.85E-02			photosynthesis, light harvesting in photosystem I (GO:0009768)	AT1G19150	PHOTOSYSTEM I CHLOROPHYLL A/B-BINDING PROTEIN 6, CHLOROPLASTIC (PTHR21649:SF5)
response to blue light (GO:0009637)	93	30	5.78	3.43E-09			photosynthesis, light harvesting in photosystem I (GO:0009768)	AT2G34420	CHLOROPHYLL A-B BINDING PROTEIN 1, CHLOROPLASTIC-RELATED (PTHR21649:SF93)
response to far red light (GO:0010218)	51	16	5.62	8.14E-04			photosynthesis, light harvesting in photosystem I (GO:0009768)	AT3G61470	PHOTOSYSTEM I CHLOROPHYLL A/B-BINDING PROTEIN 2, CHLOROPLASTIC (PTHR21649:SF80)
plant-type secondary cell wall biogenesis (GO:0009834)	59	18	5.46	2.13E-04			photosynthesis, light harvesting in photosystem I (GO:0009768)	AT2G34430	CHLOROPHYLL A-B BINDING PROTEIN 1, CHLOROPLASTIC-RELATED (PTHR21649:SF93)
response to karrikin (GO:0080167)	129	30	4.17	3.05E-06			photosynthesis, light harvesting in photosystem I (GO:0009768)	AT1G61520	PHOTOSYSTEM I CHLOROPHYLL A/B-BINDING PROTEIN 3-1, CHLOROPLASTIC (PTHR21649:SF14)
phenylpropanoid biosynthetic process (GO:0009699)	116	26	4.01	7.33E-05			photosynthesis, light harvesting in photosystem I (GO:0009768)	AT1G76570	CHLOROPHYLL A-B BINDING PROTEIN 7, CHLOROPLASTIC (PTHR21649:SF74)
lignin metabolic process (GO:0009808)	73	16	3.93	4.26E-02			photosynthesis, light harvesting in photosystem I (GO:0009768)	AT3G54890	CHLOROPHYLL A-B BINDING PROTEIN 6, CHLOROPLASTIC (PTHR21649:SF89)
response to cytokinin (GO:0009735)	231	44	3.41	1.42E-07			photosynthesis, light harvesting in photosystem I (GO:0009768)	AT2G05100	CHLOROPHYLL A-B BINDING PROTEIN 2.1, CHLOROPLASTIC-RELATED (PTHR21649:SF33)
							photosynthesis, light harvesting in photosystem I (GO:0009768)	AT2G05070	CHLOROPHYLL A-B BINDING PROTEIN 2.1, CHLOROPLASTIC-RELATED (PTHR21649:SF33)
							photosynthesis, light harvesting in photosystem I (GO:0009768)	AT1G45474	PHOTOSYSTEM I CHLOROPHYLL A/B-BINDING PROTEIN 5, CHLOROPLASTIC (PTHR21649:SF67)
							photosynthesis, light harvesting in photosystem I (GO:0009768)	AT4G10340	CHLOROPHYLL A-B BINDING PROTEIN CP26, CHLOROPLASTIC (PTHR21649:SF73)
							photosynthesis, light harvesting in photosystem I (GO:0009768)	AT1G29920	CHLOROPHYLL A-B BINDING PROTEIN 1, CHLOROPLASTIC-RELATED (PTHR21649:SF93)
							photosynthesis, light harvesting in photosystem I (GO:0009768)	AT1G29930	CHLOROPHYLL A-B BINDING PROTEIN 1, CHLOROPLASTIC-RELATED (PTHR21649:SF93)
							photosynthesis, light harvesting in photosystem I (GO:0009768)	AT1G08380	PHOTOSYSTEM I SUBUNIT O (PTHR36311:SF1)
							photosynthesis, light harvesting in photosystem I (GO:0009768)	AT1G15820	CHLOROPHYLL A-B BINDING PROTEIN, CHLOROPLASTIC (PTHR21649:SF2)
							photosynthesis, light harvesting in photosystem I (GO:0009768)	AT1G29920	CHLOROPHYLL A-B BINDING PROTEIN 1, CHLOROPLASTIC-RELATED (PTHR21649:SF93)
							protein-chromophore linkage (GO:0018298)	AT4G08920	CRYPTOCHROME-1 (PTHR11455:SF50)	DNA photolyase(PC00014);lyase(PC00144)
							protein-chromophore linkage (GO:0018298)	AT3G27690	CHLOROPHYLL A-B BINDING PROTEIN 2.4, CHLOROPLASTIC (PTHR21649:SF91)
							protein-chromophore linkage (GO:0018298)	AT2G40100	CHLOROPHYLL A-B BINDING PROTEIN CP29.3, CHLOROPLASTIC (PTHR21649:SF83)
							protein-chromophore linkage (GO:0018298)	AT3G45780	PHOTOTROPIN-1 (PTHR45637:SF20)
							protein-chromophore linkage (GO:0018298)	AT5G58140	FLIPPASE KINASE 1-RELATED (PTHR45637:SF22)
							protein-chromophore linkage (GO:0018298)	AT3G47470	CHLOROPHYLL A-B BINDING PROTEIN 4, CHLOROPLASTIC (PTHR21649:SF4)
							protein-chromophore linkage (GO:0018298)	AT5G54270	CHLOROPHYLL A-B BINDING PROTEIN 3, CHLOROPLASTIC (PTHR21649:SF7)
							protein-chromophore linkage (GO:0018298)	AT3G08940	CHLOROPHYLL A-B BINDING PROTEIN CP29.2, CHLOROPLASTIC (PTHR21649:SF71)
							protein-chromophore linkage (GO:0018298)	AT1G19150	PHOTOSYSTEM I CHLOROPHYLL A/B-BINDING PROTEIN 6, CHLOROPLASTIC (PTHR21649:SF5)
							protein-chromophore linkage (GO:0018298)	AT2G34420	CHLOROPHYLL A-B BINDING PROTEIN 1, CHLOROPLASTIC-RELATED (PTHR21649:SF93)
							protein-chromophore linkage (GO:0018298)	AT3G61470	PHOTOSYSTEM I CHLOROPHYLL A/B-BINDING PROTEIN 2, CHLOROPLASTIC (PTHR21649:SF80)
							protein-chromophore linkage (GO:0018298)	AT2G34430	CHLOROPHYLL A-B BINDING PROTEIN 1, CHLOROPLASTIC-RELATED (PTHR21649:SF93)
							protein-chromophore linkage (GO:0018298)	AT1G61520	PHOTOSYSTEM I CHLOROPHYLL A/B-BINDING PROTEIN 3-1, CHLOROPLASTIC (PTHR21649:SF14)
							protein-chromophore linkage (GO:0018298)	AT1G76570	CHLOROPHYLL A-B BINDING PROTEIN 7, CHLOROPLASTIC (PTHR21649:SF74)
							protein-chromophore linkage (GO:0018298)	AT3G54890	CHLOROPHYLL A-B BINDING PROTEIN 6, CHLOROPLASTIC (PTHR21649:SF89)
							protein-chromophore linkage (GO:0018298)	AT2G05100	CHLOROPHYLL A-B BINDING PROTEIN 2.1, CHLOROPLASTIC-RELATED (PTHR21649:SF33)
							protein-chromophore linkage (GO:0018298)	AT2G05070	CHLOROPHYLL A-B BINDING PROTEIN 2.1, CHLOROPLASTIC-RELATED (PTHR21649:SF33)
							protein-chromophore linkage (GO:0018298)	AT1G45474	PHOTOSYSTEM I CHLOROPHYLL A/B-BINDING PROTEIN 5, CHLOROPLASTIC (PTHR21649:SF67)
							protein-chromophore linkage (GO:0018298)	AT4G10340	CHLOROPHYLL A-B BINDING PROTEIN CP26, CHLOROPLASTIC (PTHR21649:SF73)
							protein-chromophore linkage (GO:0018298)	AT1G29930	CHLOROPHYLL A-B BINDING PROTEIN 1, CHLOROPLASTIC-RELATED (PTHR21649:SF93)
							protein-chromophore linkage (GO:0018298)	AT1G15820	CHLOROPHYLL A-B BINDING PROTEIN, CHLOROPLASTIC (PTHR21649:SF2)
							photosynthesis, light harvesting in photosystem II (GO:0009769)	AT3G27690	CHLOROPHYLL A-B BINDING PROTEIN 2.4, CHLOROPLASTIC (PTHR21649:SF91)
							photosynthesis, light harvesting in photosystem II (GO:0009769)	AT5G54270	CHLOROPHYLL A-B BINDING PROTEIN 3, CHLOROPLASTIC (PTHR21649:SF7)
							photosynthesis, light harvesting in photosystem II (GO:0009769)	AT2G34420	CHLOROPHYLL A-B BINDING PROTEIN 1, CHLOROPLASTIC-RELATED (PTHR21649:SF93)
							photosynthesis, light harvesting in photosystem II (GO:0009769)	AT2G34430	CHLOROPHYLL A-B BINDING PROTEIN 1, CHLOROPLASTIC-RELATED (PTHR21649:SF93)
							photosynthesis, light harvesting in photosystem II (GO:0009769)	ATCG00710	PHOTOSYSTEM II REACTION CENTER PROTEIN H (PTHR34469:SF4)
							photosynthesis, light harvesting in photosystem II (GO:0009769)	AT2G05100	CHLOROPHYLL A-B BINDING PROTEIN 2.1, CHLOROPLASTIC-RELATED (PTHR21649:SF33)
							photosynthesis, light harvesting in photosystem II (GO:0009769)	AT2G05070	CHLOROPHYLL A-B BINDING PROTEIN 2.1, CHLOROPLASTIC-RELATED (PTHR21649:SF33)
							response to low light intensity stimulus (GO:0009645)	AT4G08920	CRYPTOCHROME-1 (PTHR11455:SF50)	DNA photolyase(PC00014);lyase(PC00144)
							response to low light intensity stimulus (GO:0009645)	AT3G27690	CHLOROPHYLL A-B BINDING PROTEIN 2.4, CHLOROPLASTIC (PTHR21649:SF91)
							response to low light intensity stimulus (GO:0009645)	AT3G47470	CHLOROPHYLL A-B BINDING PROTEIN 4, CHLOROPLASTIC (PTHR21649:SF4)
							response to low light intensity stimulus (GO:0009645)	AT3G59060	TRANSCRIPTION FACTOR PIF5 (PTHR45855:SF15)
							response to low light intensity stimulus (GO:0009645)	AT3G61470	PHOTOSYSTEM I CHLOROPHYLL A/B-BINDING PROTEIN 2, CHLOROPLASTIC (PTHR21649:SF80)
							response to low light intensity stimulus (GO:0009645)	AT1G61520	PHOTOSYSTEM I CHLOROPHYLL A/B-BINDING PROTEIN 3-1, CHLOROPLASTIC (PTHR21649:SF14)
							response to low light intensity stimulus (GO:0009645)	AT3G54890	CHLOROPHYLL A-B BINDING PROTEIN 6, CHLOROPLASTIC (PTHR21649:SF89)
							response to low light intensity stimulus (GO:0009645)	AT2G05100	CHLOROPHYLL A-B BINDING PROTEIN 2.1, CHLOROPLASTIC-RELATED (PTHR21649:SF33)
							response to low light intensity stimulus (GO:0009645)	AT2G05070	CHLOROPHYLL A-B BINDING PROTEIN 2.1, CHLOROPLASTIC-RELATED (PTHR21649:SF33)
							response to low light intensity stimulus (GO:0009645)	AT1G45474	PHOTOSYSTEM I CHLOROPHYLL A/B-BINDING PROTEIN 5, CHLOROPLASTIC (PTHR21649:SF67)
							carbon fixation (GO:0015977)	AT1G12900	GLYCERALDEHYDE-3-PHOSPHATE DEHYDROGENASE GAPA2, CHLOROPLASTIC (PTHR43148:SF7)	dehydrogenase(PC00092)
							carbon fixation (GO:0015977)	AT1G67090	RIBULOSE BISPHOSPHATE CARBOXYLASE SMALL CHAIN 1A, CHLOROPLASTIC-RELATED (PTHR31262:SF10)
							carbon fixation (GO:0015977)	AT1G42970	GLYCERALDEHYDE-3-PHOSPHATE DEHYDROGENASE GAPB, CHLOROPLASTIC (PTHR43148:SF5)	dehydrogenase(PC00092)
							carbon fixation (GO:0015977)	ATCG00490	RIBULOSE BISPHOSPHATE CARBOXYLASE LARGE CHAIN (PTHR42704:SF4)	ribosomal protein(PC00202)
							carbon fixation (GO:0015977)	AT3G55800	SEDOHEPTULOSE-1,7-BISPHOSPHATASE, CHLOROPLASTIC (PTHR11556:SF35)	carbohydrate phosphatase(PC00066)
							carbon fixation (GO:0015977)	AT1G56190	PHOSPHOGLYCERATE KINASE 1, CHLOROPLASTIC-RELATED (PTHR11406:SF28)	carbohydrate kinase(PC00065)
							carbon fixation (GO:0015977)	AT1G76560	CALVIN CYCLE PROTEIN CP12-3, CHLOROPLASTIC (PTHR33921:SF16)
							carbon fixation (GO:0015977)	AT3G62410	CALVIN CYCLE PROTEIN CP12-2, CHLOROPLASTIC (PTHR33921:SF15)
							carbon fixation (GO:0015977)	AT3G54050	FRUCTOSE-1,6-BISPHOSPHATASE 1, CHLOROPLASTIC (PTHR11556:SF2)	carbohydrate phosphatase(PC00066)
							xylan biosynthetic process (GO:0045492)	AT1G27440	BETA-1,4-XYLOSYLTRANSFERASE IRX10-RELATED (PTHR11062:SF233)
							xylan biosynthetic process (GO:0045492)	AT4G24910	GLUCURONOXYLAN 4-O-METHYLTRANSFERASE-LIKE PROTEIN (DUF579) (PTHR31444:SF34)
							xylan biosynthetic process (GO:0045492)	AT5G01360	PROTEIN TRICHOME BIREFRINGENCE-LIKE 3 (PTHR32285:SF7)
							xylan biosynthetic process (GO:0045492)	AT3G55990	PROTEIN ESKIMO 1 (PTHR32285:SF10)
							xylan biosynthetic process (GO:0045492)	AT1G33800	GLUCURONOXYLAN 4-O-METHYLTRANSFERASE 2-RELATED (PTHR31444:SF26)
							xylan biosynthetic process (GO:0045492)	AT5G54690	GALACTURONOSYLTRANSFERASE 12-RELATED (PTHR32116:SF63)
							xylan biosynthetic process (GO:0045492)	AT3G18660	GLYCOGENIN, ISOFORM E (PTHR11183:SF100)
							xylan biosynthetic process (GO:0045492)	AT5G67210	PROTEIN IRX15-LIKE (PTHR31444:SF8)
							xylan biosynthetic process (GO:0045492)	AT1G73140	PROTEIN TRICHOME BIREFRINGENCE-LIKE 31 (PTHR32285:SF217)
							xylan biosynthetic process (GO:0045492)	AT4G33330	UDP-GLUCURONATE:XYLAN ALPHA-GLUCURONOSYLTRANSFERASE 2 (PTHR11183:SF44)
							xylan biosynthetic process (GO:0045492)	AT2G28110	GLUCURONOXYLAN GLUCURONOSYLTRANSFERASE IRX7-RELATED (PTHR11062:SF223)
							xylan biosynthetic process (GO:0045492)	AT1G09610	GLUCURONOXYLAN 4-O-METHYLTRANSFERASE 1 (PTHR31444:SF31)
							chlorophyll biosynthetic process (GO:0015995)	AT4G18480	MAGNESIUM-CHELATASE SUBUNIT CHLI-1, CHLOROPLASTIC (PTHR32039:SF9)
							chlorophyll biosynthetic process (GO:0015995)	AT4G27440	PROTOCHLOROPHYLLIDE REDUCTASE B, CHLOROPLASTIC (PTHR44419:SF7)
							chlorophyll biosynthetic process (GO:0015995)	AT3G59400	TETRAPYRROLE-BINDING PROTEIN, CHLOROPLASTIC (PTHR34800:SF1)
							chlorophyll biosynthetic process (GO:0015995)	AT5G45930	MAGNESIUM-CHELATASE SUBUNIT CHLI-2, CHLOROPLASTIC (PTHR32039:SF16)
							chlorophyll biosynthetic process (GO:0015995)	AT5G18660	DIVINYL CHLOROPHYLLIDE A 8-VINYL-REDUCTASE, CHLOROPLASTIC (PTHR47378:SF1)
							chlorophyll biosynthetic process (GO:0015995)	AT4G25080	MAGNESIUM PROTOPORPHYRIN IX METHYLTRANSFERASE, CHLOROPLASTIC (PTHR43591:SF9)	methyltransferase(PC00155)
							chlorophyll biosynthetic process (GO:0015995)	AT3G56940	MAGNESIUM-PROTOPORPHYRIN IX MONOMETHYL ESTER [OXIDATIVE] CYCLASE, CHLOROPLASTIC (PTHR31053:SF2)
							chlorophyll biosynthetic process (GO:0015995)	AT1G44446	CHLOROPHYLLIDE A OXYGENASE, CHLOROPLASTIC (PTHR21266:SF19)	oxygenase(PC00177)
							chlorophyll biosynthetic process (GO:0015995)	AT1G03630	PROTOCHLOROPHYLLIDE REDUCTASE C, CHLOROPLASTIC (PTHR44419:SF8)
							chlorophyll biosynthetic process (GO:0015995)	AT1G08520	MAGNESIUM-CHELATASE SUBUNIT CHLD, CHLOROPLASTIC (PTHR43473:SF2)
							chlorophyll biosynthetic process (GO:0015995)	AT5G08280	PORPHOBILINOGEN DEAMINASE (PTHR11557:SF0)	deaminase(PC00088)
							chlorophyll biosynthetic process (GO:0015995)	AT1G74470	GERANYLGERANYL DIPHOSPHATE REDUCTASE, CHLOROPLASTIC (PTHR42685:SF3)	oxidoreductase(PC00176)
							response to blue light (GO:0009637)	AT1G42550	PROTEIN PLASTID MOVEMENT IMPAIRED 1 (PTHR33414:SF2)
							response to blue light (GO:0009637)	AT5G58140	FLIPPASE KINASE 1-RELATED (PTHR45637:SF22)
							response to blue light (GO:0009637)	AT1G75100	J DOMAIN-CONTAINING PROTEIN REQUIRED FOR CHLOROPLAST ACCUMULATION RESPONSE 1 (PTHR23172:SF64)	chaperone(PC00072);non-receptor serine/threonine protein kinase(PC00167)
							response to blue light (GO:0009637)	AT1G67090	RIBULOSE BISPHOSPHATE CARBOXYLASE SMALL CHAIN 1A, CHLOROPLASTIC-RELATED (PTHR31262:SF10)
							response to blue light (GO:0009637)	AT3G08940	CHLOROPHYLL A-B BINDING PROTEIN CP29.2, CHLOROPLASTIC (PTHR21649:SF71)
							response to blue light (GO:0009637)	AT1G19150	PHOTOSYSTEM I CHLOROPHYLL A/B-BINDING PROTEIN 6, CHLOROPLASTIC (PTHR21649:SF5)
							response to blue light (GO:0009637)	AT3G59060	TRANSCRIPTION FACTOR PIF5 (PTHR45855:SF15)
							response to blue light (GO:0009637)	AT2G02950	PROTEIN PHYTOCHROME KINASE SUBSTRATE 1 (PTHR33781:SF5)
							response to blue light (GO:0009637)	AT2G36990	RNA POLYMERASE SIGMA FACTOR SIGF, CHLOROPLASTIC (PTHR30603:SF9)	winged helix/forkhead transcription factor(PC00246)
							response to blue light (GO:0009637)	AT4G31390	PROTEIN ACTIVITY OF BC1 COMPLEX KINASE 1, CHLOROPLASTIC (PTHR10566:SF53)
							response to blue light (GO:0009637)	AT1G76570	CHLOROPHYLL A-B BINDING PROTEIN 7, CHLOROPLASTIC (PTHR21649:SF74)
							response to blue light (GO:0009637)	AT2G30520	ROOT PHOTOTROPISM PROTEIN 2 (PTHR32370:SF17)
							response to blue light (GO:0009637)	AT1G08810	MYB TRANSCRIPTION FACTOR (PTHR10641:SF1152)	DNA binding protein(PC00009);homeodomain transcription factor(PC00119)
							response to blue light (GO:0009637)	AT3G54890	CHLOROPHYLL A-B BINDING PROTEIN 6, CHLOROPLASTIC (PTHR21649:SF89)
							response to blue light (GO:0009637)	AT5G43630	ZINC KNUCKLE (CCHC-TYPE) FAMILY PROTEIN (PTHR13115:SF9)
							response to blue light (GO:0009637)	AT2G05100	CHLOROPHYLL A-B BINDING PROTEIN 2.1, CHLOROPLASTIC-RELATED (PTHR21649:SF33)
							response to blue light (GO:0009637)	AT3G21150	B-BOX ZINC FINGER PROTEIN 32 (PTHR31717:SF22)
							response to blue light (GO:0009637)	AT3G01470	HOMEOBOX-LEUCINE ZIPPER PROTEIN HAT5 (PTHR24326:SF497)
							response to blue light (GO:0009637)	AT4G34530	TRANSCRIPTION FACTOR BHLH63 (PTHR12565:SF331)
							response to blue light (GO:0009637)	AT4G10340	CHLOROPHYLL A-B BINDING PROTEIN CP26, CHLOROPLASTIC (PTHR21649:SF73)
							response to blue light (GO:0009637)	AT1G21970	NUCLEAR TRANSCRIPTION FACTOR Y SUBUNIT B-9 (PTHR11064:SF115)
							response to blue light (GO:0009637)	AT1G29920	CHLOROPHYLL A-B BINDING PROTEIN 1, CHLOROPLASTIC-RELATED (PTHR21649:SF93)
							response to far red light (GO:0010218)	AT2G40100	CHLOROPHYLL A-B BINDING PROTEIN CP29.3, CHLOROPLASTIC (PTHR21649:SF83)
							response to far red light (GO:0010218)	AT3G22840	EARLY LIGHT-INDUCED PROTEIN 1, CHLOROPLASTIC-RELATED (PTHR14154:SF5)
							response to far red light (GO:0010218)	AT5G11260	TRANSCRIPTION FACTOR HY5 (PTHR46714:SF6)
							response to far red light (GO:0010218)	AT1G67090	RIBULOSE BISPHOSPHATE CARBOXYLASE SMALL CHAIN 1A, CHLOROPLASTIC-RELATED (PTHR31262:SF10)
							response to far red light (GO:0010218)	AT3G08940	CHLOROPHYLL A-B BINDING PROTEIN CP29.2, CHLOROPLASTIC (PTHR21649:SF71)
							response to far red light (GO:0010218)	AT1G19150	PHOTOSYSTEM I CHLOROPHYLL A/B-BINDING PROTEIN 6, CHLOROPLASTIC (PTHR21649:SF5)
							response to far red light (GO:0010218)	AT2G01570	DELLA PROTEIN GAI-RELATED (PTHR31636:SF47)
							response to far red light (GO:0010218)	AT2G02950	PROTEIN PHYTOCHROME KINASE SUBSTRATE 1 (PTHR33781:SF5)
							response to far red light (GO:0010218)	AT1G76570	CHLOROPHYLL A-B BINDING PROTEIN 7, CHLOROPLASTIC (PTHR21649:SF74)
							response to far red light (GO:0010218)	AT3G54890	CHLOROPHYLL A-B BINDING PROTEIN 6, CHLOROPLASTIC (PTHR21649:SF89)
							response to far red light (GO:0010218)	AT2G05100	CHLOROPHYLL A-B BINDING PROTEIN 2.1, CHLOROPLASTIC-RELATED (PTHR21649:SF33)
							response to far red light (GO:0010218)	AT2G05070	CHLOROPHYLL A-B BINDING PROTEIN 2.1, CHLOROPLASTIC-RELATED (PTHR21649:SF33)
							response to far red light (GO:0010218)	AT4G10340	CHLOROPHYLL A-B BINDING PROTEIN CP26, CHLOROPLASTIC (PTHR21649:SF73)
							response to far red light (GO:0010218)	AT1G29920	CHLOROPHYLL A-B BINDING PROTEIN 1, CHLOROPLASTIC-RELATED (PTHR21649:SF93)
							plant-type secondary cell wall biogenesis (GO:0009834)	AT1G27440	BETA-1,4-XYLOSYLTRANSFERASE IRX10-RELATED (PTHR11062:SF233)
							plant-type secondary cell wall biogenesis (GO:0009834)	AT1G17950	TRANSCRIPTION FACTOR MYB52 (PTHR45614:SF16)
							plant-type secondary cell wall biogenesis (GO:0009834)	AT2G20520	FASCICLIN-LIKE ARABINOGALACTAN PROTEIN 6-RELATED (PTHR32077:SF54)
							plant-type secondary cell wall biogenesis (GO:0009834)	AT4G24910	GLUCURONOXYLAN 4-O-METHYLTRANSFERASE-LIKE PROTEIN (DUF579) (PTHR31444:SF34)
							plant-type secondary cell wall biogenesis (GO:0009834)	AT2G46770	NAC DOMAIN-CONTAINING PROTEIN 43 (PTHR31989:SF246)
							plant-type secondary cell wall biogenesis (GO:0009834)	AT5G15630	COBRA-LIKE PROTEIN 4 (PTHR31673:SF23)
							plant-type secondary cell wall biogenesis (GO:0009834)	AT1G33800	GLUCURONOXYLAN 4-O-METHYLTRANSFERASE 2-RELATED (PTHR31444:SF26)
							plant-type secondary cell wall biogenesis (GO:0009834)	AT2G40320	PROTEIN TRICHOME BIREFRINGENCE-LIKE 33 (PTHR32285:SF62)
							plant-type secondary cell wall biogenesis (GO:0009834)	AT2G38080	LACCASE-4 (PTHR11709:SF272)	oxidase(PC00175)
							plant-type secondary cell wall biogenesis (GO:0009834)	AT4G18780	CELLULOSE SYNTHASE A CATALYTIC SUBUNIT 8 [UDP-FORMING] (PTHR13301:SF31)
							plant-type secondary cell wall biogenesis (GO:0009834)	AT3G18660	GLYCOGENIN, ISOFORM E (PTHR11183:SF100)
							plant-type secondary cell wall biogenesis (GO:0009834)	AT5G67210	PROTEIN IRX15-LIKE (PTHR31444:SF8)
							plant-type secondary cell wall biogenesis (GO:0009834)	AT5G44030	CELLULOSE SYNTHASE A CATALYTIC SUBUNIT 4 [UDP-FORMING] (PTHR13301:SF91)
							plant-type secondary cell wall biogenesis (GO:0009834)	AT5G03170	FASCICLIN-LIKE ARABINOGALACTAN PROTEIN 11 (PTHR32077:SF6)
							plant-type secondary cell wall biogenesis (GO:0009834)	AT4G33330	UDP-GLUCURONATE:XYLAN ALPHA-GLUCURONOSYLTRANSFERASE 2 (PTHR11183:SF44)
							plant-type secondary cell wall biogenesis (GO:0009834)	AT2G28110	GLUCURONOXYLAN GLUCURONOSYLTRANSFERASE IRX7-RELATED (PTHR11062:SF223)
							plant-type secondary cell wall biogenesis (GO:0009834)	AT5G17420	CELLULOSE SYNTHASE A CATALYTIC SUBUNIT 7 [UDP-FORMING] (PTHR13301:SF28)
							plant-type secondary cell wall biogenesis (GO:0009834)	AT1G09610	GLUCURONOXYLAN 4-O-METHYLTRANSFERASE 1 (PTHR31444:SF31)
							response to karrikin (GO:0080167)	AT5G08640	FLAVONOL SYNTHASE/FLAVANONE 3-HYDROXYLASE-RELATED (PTHR10209:SF95)
							response to karrikin (GO:0080167)	AT3G52740	PROTEIN BIC1 (PTHR34207:SF2)
							response to karrikin (GO:0080167)	AT5G13750	PROTEIN ZINC INDUCED FACILITATOR-LIKE 1 (PTHR23504:SF15)
							response to karrikin (GO:0080167)	AT1G23010	MULTICOPPER OXIDASE LPR1 (PTHR11709:SF298)	oxidase(PC00175)
							response to karrikin (GO:0080167)	AT2G30490	TRANS-CINNAMATE 4-MONOOXYGENASE (PTHR24298:SF695)	oxygenase(PC00177)
							response to karrikin (GO:0080167)	AT1G05680	UDP-GLYCOSYLTRANSFERASE 74E1-RELATED (PTHR11926:SF1202)
							response to karrikin (GO:0080167)	AT5G48500	PATHOGENIC TYPE III EFFECTOR AVIRULENCE FACTOR AVR AVRRPT-CLEAVAGE: CLEAVAGE SITE PROTEIN (PTHR33699:SF2)
							response to karrikin (GO:0080167)	AT4G37370	CYTOCHROME P450, FAMILY 81, SUBFAMILY D, POLYPEPTIDE 2-RELATED (PTHR24298:SF462)	oxygenase(PC00177)
							response to karrikin (GO:0080167)	AT3G21090	ABC TRANSPORTER G FAMILY MEMBER 15 (PTHR19241:SF532)
							response to karrikin (GO:0080167)	AT3G22840	EARLY LIGHT-INDUCED PROTEIN 1, CHLOROPLASTIC-RELATED (PTHR14154:SF5)
							response to karrikin (GO:0080167)	AT3G02910	GAMMA-GLUTAMYLAMINECYCLOTRANSFERASE (PTHR12510:SF4)
							response to karrikin (GO:0080167)	AT5G11260	TRANSCRIPTION FACTOR HY5 (PTHR46714:SF6)
							response to karrikin (GO:0080167)	AT2G37040	PHENYLALANINE AMMONIA-LYASE 1 (PTHR10362:SF43)
							response to karrikin (GO:0080167)	AT4G30400	RING-H2 FINGER PROTEIN ATL13 (PTHR45768:SF10)
							response to karrikin (GO:0080167)	AT3G47470	CHLOROPHYLL A-B BINDING PROTEIN 4, CHLOROPLASTIC (PTHR21649:SF4)
							response to karrikin (GO:0080167)	AT2G47930	CLASSICAL ARABINOGALACTAN PROTEIN 26 (PTHR35725:SF4)
							response to karrikin (GO:0080167)	AT2G26250	3-KETOACYL-COA SYNTHASE 10 (PTHR31561:SF2)
							response to karrikin (GO:0080167)	AT1G17200	CASP-LIKE PROTEIN 2A1 (PTHR11615:SF212)	dehydrogenase(PC00092);reductase(PC00198)
							response to karrikin (GO:0080167)	AT2G23910	SUBFAMILY NOT NAMED (PTHR10366:SF390)	dehydratase(PC00091);epimerase/racemase(PC00096);oxidoreductase(PC00176)
							response to karrikin (GO:0080167)	AT3G57520	GALACTINOL--SUCROSE GALACTOSYLTRANSFERASE 2-RELATED (PTHR31268:SF32)
							response to karrikin (GO:0080167)	AT5G17050	UDP-GLYCOSYLTRANSFERASE 78D1-RELATED (PTHR11926:SF451)
							response to karrikin (GO:0080167)	AT3G11600	E3 UBIQUITIN-PROTEIN LIGASE (PTHR33177:SF32)
							response to karrikin (GO:0080167)	AT4G13510	AMMONIUM TRANSPORTER (PTHR11730:SF6)	transporter(PC00227)
							response to karrikin (GO:0080167)	AT1G74670	GIBBERELLIN-REGULATED PROTEIN 6 (PTHR23201:SF64)
							response to karrikin (GO:0080167)	AT4G03280	CYTOCHROME B6-F COMPLEX IRON-SULFUR SUBUNIT, CHLOROPLASTIC (PTHR10134:SF5)
							response to karrikin (GO:0080167)	AT3G61220	(+)-NEOMENTHOL DEHYDROGENASE-RELATED (PTHR43490:SF75)	dehydrogenase(PC00092);reductase(PC00198)
							response to karrikin (GO:0080167)	AT1G44575	PHOTOSYSTEM II 22 KDA PROTEIN, CHLOROPLASTIC (PTHR14154:SF17)
							response to karrikin (GO:0080167)	AT3G55120	CHALCONE--FLAVONONE ISOMERASE 1-RELATED (PTHR28039:SF8)
							response to karrikin (GO:0080167)	AT4G37470	ESTERASE KAI2-RELATED (PTHR43039:SF3)	serine protease(PC00203)
							response to karrikin (GO:0080167)	AT2G41040	SUBFAMILY NOT NAMED (PTHR43591:SF48)
							phenylpropanoid biosynthetic process (GO:0009699)	AT4G39330	CINNAMYL ALCOHOL DEHYDROGENASE 9-RELATED (PTHR42683:SF52)	dehydrogenase(PC00092);reductase(PC00198)
							phenylpropanoid biosynthetic process (GO:0009699)	AT3G24503	ALDEHYDE DEHYDROGENASE FAMILY 2 MEMBER C4 (PTHR11699:SF182)	dehydrogenase(PC00092)
							phenylpropanoid biosynthetic process (GO:0009699)	AT5G13930	CHALCONE SYNTHASE (PTHR11877:SF14)	lyase(PC00144);transferase(PC00220)
							phenylpropanoid biosynthetic process (GO:0009699)	AT2G30490	TRANS-CINNAMATE 4-MONOOXYGENASE (PTHR24298:SF695)	oxygenase(PC00177)
							phenylpropanoid biosynthetic process (GO:0009699)	AT1G22640	TRANSCRIPTION FACTOR MYB3-RELATED (PTHR10641:SF929)	DNA binding protein(PC00009);homeodomain transcription factor(PC00119)
							phenylpropanoid biosynthetic process (GO:0009699)	AT4G34050	CAFFEOYL-COA O-METHYLTRANSFERASE 1 (PTHR10509:SF60)	methyltransferase(PC00155)
							phenylpropanoid biosynthetic process (GO:0009699)	AT5G60020	LACCASE-17 (PTHR11709:SF266)	oxidase(PC00175)
							phenylpropanoid biosynthetic process (GO:0009699)	AT2G46770	NAC DOMAIN-CONTAINING PROTEIN 43 (PTHR31989:SF246)
							phenylpropanoid biosynthetic process (GO:0009699)	AT5G48930	SHIKIMATE O-HYDROXYCINNAMOYLTRANSFERASE (PTHR31642:SF11)
							phenylpropanoid biosynthetic process (GO:0009699)	AT5G14700	CINNAMOYL COA REDUCTASE-LIKE PROTEIN (PTHR10366:SF483)	dehydratase(PC00091);epimerase/racemase(PC00096);oxidoreductase(PC00176)
							phenylpropanoid biosynthetic process (GO:0009699)	AT2G37040	PHENYLALANINE AMMONIA-LYASE 1 (PTHR10362:SF43)
							phenylpropanoid biosynthetic process (GO:0009699)	AT3G53510	ABC TRANSPORTER G FAMILY MEMBER 20 (PTHR19241:SF600)
							phenylpropanoid biosynthetic process (GO:0009699)	AT5G54160	ACETYLSEROTONIN O-METHYLTRANSFERASE (PTHR11746:SF199)
							phenylpropanoid biosynthetic process (GO:0009699)	AT4G22880	LEUCOANTHOCYANIDIN DIOXYGENASE (PTHR10209:SF497)
							phenylpropanoid biosynthetic process (GO:0009699)	AT2G23910	SUBFAMILY NOT NAMED (PTHR10366:SF390)	dehydratase(PC00091);epimerase/racemase(PC00096);oxidoreductase(PC00176)
							phenylpropanoid biosynthetic process (GO:0009699)	AT2G38080	LACCASE-4 (PTHR11709:SF272)	oxidase(PC00175)
							phenylpropanoid biosynthetic process (GO:0009699)	AT4G39230	ISOFLAVONE REDUCTASE HOMOLOG PCBER1 (PTHR43349:SF35)	dehydratase(PC00091);epimerase/racemase(PC00096);oxidoreductase(PC00176)
							phenylpropanoid biosynthetic process (GO:0009699)	AT2G40890	CYTOCHROME P450 98A3 (PTHR24298:SF1)	oxygenase(PC00177)
							phenylpropanoid biosynthetic process (GO:0009699)	AT3G16920	CHITINASE-LIKE PROTEIN 2 (PTHR22595:SF96)
							phenylpropanoid biosynthetic process (GO:0009699)	AT4G23690	DIRIGENT PROTEIN 6 (PTHR46442:SF8)
							phenylpropanoid biosynthetic process (GO:0009699)	AT5G03260	LACCASE-11 (PTHR11709:SF207)	oxidase(PC00175)
							phenylpropanoid biosynthetic process (GO:0009699)	AT4G31940	CYTOCHROME P450 82C2-RELATED (PTHR24298:SF225)	oxygenase(PC00177)
							phenylpropanoid biosynthetic process (GO:0009699)	AT5G22500	FATTY ACYL-COA REDUCTASE-RELATED (PTHR11011:SF67)
							phenylpropanoid biosynthetic process (GO:0009699)	AT1G04220	3-KETOACYL-COA SYNTHASE 2 (PTHR31561:SF109)
							phenylpropanoid biosynthetic process (GO:0009699)	AT1G32100	PINORESINOL REDUCTASE 1-RELATED (PTHR43349:SF4)	dehydratase(PC00091);epimerase/racemase(PC00096);oxidoreductase(PC00176)
							phenylpropanoid biosynthetic process (GO:0009699)	AT5G22500	FATTY ACYL-COA REDUCTASE-RELATED (PTHR11011:SF67)
							lignin metabolic process (GO:0009808)	AT4G39330	CINNAMYL ALCOHOL DEHYDROGENASE 9-RELATED (PTHR42683:SF52)	dehydrogenase(PC00092);reductase(PC00198)
							lignin metabolic process (GO:0009808)	AT2G30490	TRANS-CINNAMATE 4-MONOOXYGENASE (PTHR24298:SF695)	oxygenase(PC00177)
							lignin metabolic process (GO:0009808)	AT3G09220	LACCASE-7 (PTHR11709:SF9)	oxidase(PC00175)
							lignin metabolic process (GO:0009808)	AT5G60020	LACCASE-17 (PTHR11709:SF266)	oxidase(PC00175)
							lignin metabolic process (GO:0009808)	AT2G46770	NAC DOMAIN-CONTAINING PROTEIN 43 (PTHR31989:SF246)
							lignin metabolic process (GO:0009808)	AT5G48930	SHIKIMATE O-HYDROXYCINNAMOYLTRANSFERASE (PTHR31642:SF11)
							lignin metabolic process (GO:0009808)	AT5G14700	CINNAMOYL COA REDUCTASE-LIKE PROTEIN (PTHR10366:SF483)	dehydratase(PC00091);epimerase/racemase(PC00096);oxidoreductase(PC00176)
							lignin metabolic process (GO:0009808)	AT2G37040	PHENYLALANINE AMMONIA-LYASE 1 (PTHR10362:SF43)
							lignin metabolic process (GO:0009808)	AT1G33800	GLUCURONOXYLAN 4-O-METHYLTRANSFERASE 2-RELATED (PTHR31444:SF26)
							lignin metabolic process (GO:0009808)	AT5G58910	LACCASE-16 (PTHR11709:SF319)	oxidase(PC00175)
							lignin metabolic process (GO:0009808)	AT5G54160	ACETYLSEROTONIN O-METHYLTRANSFERASE (PTHR11746:SF199)
							lignin metabolic process (GO:0009808)	AT2G23910	SUBFAMILY NOT NAMED (PTHR10366:SF390)	dehydratase(PC00091);epimerase/racemase(PC00096);oxidoreductase(PC00176)
							lignin metabolic process (GO:0009808)	AT2G38080	LACCASE-4 (PTHR11709:SF272)	oxidase(PC00175)
							lignin metabolic process (GO:0009808)	AT2G40890	CYTOCHROME P450 98A3 (PTHR24298:SF1)	oxygenase(PC00177)
							lignin metabolic process (GO:0009808)	AT3G16920	CHITINASE-LIKE PROTEIN 2 (PTHR22595:SF96)
							lignin metabolic process (GO:0009808)	AT5G03260	LACCASE-11 (PTHR11709:SF207)	oxidase(PC00175)
							response to cytokinin (GO:0009735)	AT4G39330	CINNAMYL ALCOHOL DEHYDROGENASE 9-RELATED (PTHR42683:SF52)	dehydrogenase(PC00092);reductase(PC00198)
							response to cytokinin (GO:0009735)	ATCG00130	ATP SYNTHASE SUBUNIT B, CHLOROPLASTIC (PTHR34264:SF3)
							response to cytokinin (GO:0009735)	AT5G20630	GERMIN-LIKE PROTEIN SUBFAMILY 3 MEMBER 3 (PTHR31238:SF153)
							response to cytokinin (GO:0009735)	AT3G25920	54S RIBOSOMAL PROTEIN L10, MITOCHONDRIAL (PTHR12934:SF11)
							response to cytokinin (GO:0009735)	AT3G16360	HISTIDINE-CONTAINING PHOSPHOTRANSFER PROTEIN 4 (PTHR28242:SF43)
							response to cytokinin (GO:0009735)	AT4G25130	PEPTIDE METHIONINE SULFOXIDE REDUCTASE (PTHR42799:SF2)	reductase(PC00198)
							response to cytokinin (GO:0009735)	AT3G27925	PROTEASE DO-LIKE 1, CHLOROPLASTIC (PTHR43019:SF26)	serine protease(PC00203)
							response to cytokinin (GO:0009735)	AT1G07890	L-ASCORBATE PEROXIDASE 1, CYTOSOLIC (PTHR31356:SF40)
							response to cytokinin (GO:0009735)	AT1G16880	ACT DOMAIN-CONTAINING PROTEIN ACR11 (PTHR31096:SF16)
							response to cytokinin (GO:0009735)	AT4G18480	MAGNESIUM-CHELATASE SUBUNIT CHLI-1, CHLOROPLASTIC (PTHR32039:SF9)
							response to cytokinin (GO:0009735)	AT4G28750	PHOTOSYSTEM I REACTION CENTER SUBUNIT IV A, CHLOROPLASTIC-RELATED (PTHR34549:SF2)
							response to cytokinin (GO:0009735)	AT1G12000	PYROPHOSPHATE--FRUCTOSE 6-PHOSPHATE 1-PHOSPHOTRANSFERASE SUBUNIT BETA 1 (PTHR43650:SF13)	carbohydrate kinase(PC00065)
							response to cytokinin (GO:0009735)	AT3G14420	(S)-2-HYDROXY-ACID OXIDASE GLO1 (PTHR10578:SF114)
							response to cytokinin (GO:0009735)	AT4G32260	SUBFAMILY NOT NAMED (PTHR33445:SF2)
							response to cytokinin (GO:0009735)	AT3G56380	TWO-COMPONENT RESPONSE REGULATOR ARR17 (PTHR43874:SF107)	methyltransferase(PC00155);protein kinase(PC00193);transcription factor(PC00218)
							response to cytokinin (GO:0009735)	AT5G58140	FLIPPASE KINASE 1-RELATED (PTHR45637:SF22)
							response to cytokinin (GO:0009735)	AT1G20020	FERREDOXIN--NADP REDUCTASE, LEAF ISOZYME 2, CHLOROPLASTIC (PTHR43314:SF11)
							response to cytokinin (GO:0009735)	AT4G09650	ATP SYNTHASE SUBUNIT DELTA, CHLOROPLASTIC (PTHR11910:SF15)
							response to cytokinin (GO:0009735)	AT4G25050	ACYL CARRIER PROTEIN 4, CHLOROPLASTIC (PTHR46153:SF11)
							response to cytokinin (GO:0009735)	AT1G79040	PHOTOSYSTEM II 10 KDA POLYPEPTIDE, CHLOROPLASTIC (PTHR34369:SF4)
							response to cytokinin (GO:0009735)	AT2G47000	ABC TRANSPORTER B FAMILY MEMBER 4 (PTHR24221:SF506)	cysteine protease(PC00081);serine protease(PC00203)
							response to cytokinin (GO:0009735)	AT1G69040	ACT DOMAIN REPEAT 4-RELATED (PTHR31096:SF22)
							response to cytokinin (GO:0009735)	AT3G08940	CHLOROPHYLL A-B BINDING PROTEIN CP29.2, CHLOROPLASTIC (PTHR21649:SF71)
							response to cytokinin (GO:0009735)	AT5G14320	37S RIBOSOMAL PROTEIN SWS2, MITOCHONDRIAL (PTHR10871:SF1)
							response to cytokinin (GO:0009735)	AT5G42270	ATP-DEPENDENT ZINC METALLOPROTEASE FTSH 1, CHLOROPLASTIC-RELATED (PTHR23076:SF97)
							response to cytokinin (GO:0009735)	AT3G63140	CHLOROPLAST STEM-LOOP BINDING PROTEIN OF 41 KDA A, CHLOROPLASTIC (PTHR43725:SF6)	dehydratase(PC00091);epimerase/racemase(PC00096);oxidoreductase(PC00176)
							response to cytokinin (GO:0009735)	ATCG00650	28S RIBOSOMAL PROTEIN S18C, MITOCHONDRIAL (PTHR13479:SF40)	ribosomal protein(PC00202)
							response to cytokinin (GO:0009735)	ATCG00050	30S RIBOSOMAL PROTEIN S16, CHLOROPLASTIC (PTHR12919:SF29)	ribosomal protein(PC00202)
							response to cytokinin (GO:0009735)	AT2G30950	ATP-DEPENDENT ZINC METALLOPROTEASE FTSH 2, CHLOROPLASTIC (PTHR23076:SF100)	metalloprotease(PC00153)
							response to cytokinin (GO:0009735)	AT5G23120	PHOTOSYSTEM II STABILITY/ASSEMBLY FACTOR HCF136, CHLOROPLASTIC (PTHR47199:SF2)
							response to cytokinin (GO:0009735)	AT1G52230	PHOTOSYSTEM I REACTION CENTER SUBUNIT VI-2, CHLOROPLASTIC (PTHR34787:SF1)
							response to cytokinin (GO:0009735)	AT1G32060	PHOSPHORIBULOKINASE, CHLOROPLASTIC (PTHR10285:SF155)	glycosyltransferase(PC00111);nucleotide kinase(PC00172)
							response to cytokinin (GO:0009735)	AT5G45930	MAGNESIUM-CHELATASE SUBUNIT CHLI-2, CHLOROPLASTIC (PTHR32039:SF16)
							response to cytokinin (GO:0009735)	AT5G40950	39S RIBOSOMAL PROTEIN L27, MITOCHONDRIAL (PTHR15893:SF0)	ribosomal protein(PC00202)
							response to cytokinin (GO:0009735)	AT1G11260	SUGAR TRANSPORT PROTEIN 1 (PTHR23500:SF466)	carbohydrate transporter(PC00067)
							response to cytokinin (GO:0009735)	AT1G78630	50S RIBOSOMAL PROTEIN L13, CHLOROPLASTIC (PTHR11545:SF16)	ribosomal protein(PC00202)
							response to cytokinin (GO:0009735)	AT1G61520	PHOTOSYSTEM I CHLOROPHYLL A/B-BINDING PROTEIN 3-1, CHLOROPLASTIC (PTHR21649:SF14)
							response to cytokinin (GO:0009735)	AT5G45890	SENESCENCE-SPECIFIC CYSTEINE PROTEASE SAG12 (PTHR12411:SF653)	cysteine protease(PC00081);protease inhibitor(PC00191)
							response to cytokinin (GO:0009735)	AT2G20260	PHOTOSYSTEM I REACTION CENTER SUBUNIT IV A, CHLOROPLASTIC-RELATED (PTHR34549:SF2)
							response to cytokinin (GO:0009735)	AT5G35630	GLUTAMINE SYNTHETASE, CHLOROPLASTIC/MITOCHONDRIAL (PTHR20852:SF84)	ligase(PC00142)
							response to cytokinin (GO:0009735)	AT3G54050	FRUCTOSE-1,6-BISPHOSPHATASE 1, CHLOROPLASTIC (PTHR11556:SF2)	carbohydrate phosphatase(PC00066)
							response to cytokinin (GO:0009735)	AT4G26150	GATA TRANSCRIPTION FACTOR 22-RELATED (PTHR47255:SF4)
							response to cytokinin (GO:0009735)	AT5G07020	PROTEIN MAINTENANCE OF PSII UNDER HIGH LIGHT 1 (PTHR35753:SF2)
							response to cytokinin (GO:0009735)	AT4G20260	PLASMA MEMBRANE-ASSOCIATED CATION-BINDING PROTEIN 1-RELATED (PTHR38522:SF2)
