# Supplementary material for: Reprogramming of the Developmental Program of Rhus javanica During Initial Stage of Gall Induction by Schlechtendalia chinensis
Source: Front Plant Sci. 2020 May 15;11:471. doi: 10.3389/fpls.2020.00471 (PMC7243852; doi:10.3389/fpls.2020.00471)
Supplement: TABLE S7 — Result of GO enrichment analysis of down-regulated gens in gall of R. javanica. [file Table_7.XLSX]

## Sheet: Table
Secondary Metabolism	Terpenoid synthesis	At1g61680	At1g78950	At3g25810	At5g23960
	acyl-lipid metabolism	At4g25050	At5g49950	At1g72110
	Phenylalanine, tyrosine and tryptophan biosynthesis	At1g22410	At3g06350	At4g35090	At3g53260	At3g06350
	Phenylpropanoid synthesis	At2g22990	At1g48130	At4g34230
	Flavonol, Anthocyanin synthesis	At1g22380	At5g54010	At5g07990	At5g13930	At3g21560	At5g23260	At5g35550
	Suberin synthesis (WAX)	At3g44540	At4g34100
Plant hormone signal transduction	JA signaling	At1g13280	At1g30135	At1g61340	At1g74950	At2g27690	At2g43710	At3g25780	At3g50440	At5g05600	At5g07010
		At5g13220	At1g19180	At1g74950	At3g25780
	Auxin signaling	At1g04250	At1g20925	At1g53700	At2g14960	At2g23170	At2g47260	At5g47530	At1g74950
	Ethylene signaling	At1g19210	At1g33760	At2g19590	At2g44840	At3g16770	At4g34410	At3g61510	At4g11280	At2g19590
	ABA signaling	At1g65690	At3g45640	At5g51990	At5g59550	At5g64750
	cytokinin signaling	At3g22640	At4g27950	At5g56970	At1g03430
	GA signaling	At1g14920	At1g78440	At2g36690	At4g35390	At5g65640	At5g65640	At1g79460
Development	floral genes	At3g10390	At3g58780	At4g14900	At4g18960	At5g01370	At5g15800	At5g57520	At5g61850	At3g02310	At1g24260
		At1g69120
	vein development	At4g17350	At5g13180
	root hair or tricome or pollen tube	At3g20630	At4g20780	At5g35390
	regeneration	At3g05540	At4g08150	At1G70510	AT1G62360	At1G23380	At5g50100
	regulation of meristem growth	At1g31320	At3g27650
	stomatal development	At1g04110
Biotic stress / Abiotic stress	abiotic stress	At1g01470	At1g09970	At1g12610	At1g20440	At1g20450	At1g20620	At1g20630	At5g52300	At5g52300	At1g21910
		At1g21980	At1g22810	At1g29290	At1g35910	At1g54050	At1g54410	At1g54850	At1g56600	At1g59960	At1g60190
		At1g61340	At1g76180	At1g77120	At1g78090	At2g01450	At2g17840	At2g21660	At2g22960	At2g25900	At2g25940
		At2g31180	At2g32120	At5g62020	At2g22880	At2g47180	At2g47190	At1g56600	At1g61340	At5g47550	At3g03270
		At3g05550	At3g09390	At3g09640	At3g12580	At3g22490	At3g24500	At3g28210	At4g15480	At4g21100	At4g25470
		At4g27410	At5g13170	At5g40010	At4g35090	At5g24110
	Plant-pathogen interaction	At1g20030	At1g12220	At1g17860	At3g45420	At2g38470	At3g45640	At4g19840	At4g19850	At2g28710	At5g42380
		At2g27880	At3g50930	At1g08320	At5g47910	At5g40990	At5g52020	At5g52450	At5g49520	At5g37490	At3g48990
		At2g30020	At5g26920	At1g75040	At4g23160	At4g10490	At5g05300	At3g55840	At3g12500	At4g12560	At5g21090
		At2g43710	At4g39980	At1g12663	At5g06320	At3g14460	At3g44350	At3g04740	At1g24140	At3g14470	At2g05940
		At3g48990	At3g16030	At2g28790	At3g50930	At1g69550	At3g11480	At3g11840	At1g18570	At1g80840	At1g70170
		At2g46240	At3g45420	At3g11480	At5g52640	At5g24090	At3g54420	At2g24300	At2g39210	At2g40000	At2g43700
protein synthesis/degradation	protein folding	At2g21130	At3g44110	At4g27670	At5g02500	At5g37380	At5g52640	At1g54050	At3g12580	At3g44110
		At4g10250	At4g27670	At5g12020	At5g52640
	Ribosomal protein	At2g32060	At3g47370	At3g61110	At4g31985	At5g03850	At5g56670	At5g57290
	protease	At1g09750	At1g11080	At1g24140	At1g33540
Others	Cell wall	At1g11330	At1g32180	At1g75680	At1g76160	At2g06850	At2g41640	At3g01190	At3g09520	At3g13790	At3g14040
		At1g02800	At3g28340	At3g45970	At3g45970	At3g60730	At4g02290	At4g18180	At4g18780	At4g25240	At4g25810
		At4g33440	At4g38400	At5g16910	At5g53250	At5g57550	At5g57560	At5g24318	AT2G41480
	Transport	At1g08440	At1g29300	At2g38290	At2g39510	At5g63850	At3g07600	At3g12750	At4g39700	At1g22710
		At2g22500	At4g10850	At1g10180	At2g45960	At4g01470	At1g77380

## Sheet: Secondary Metabolism
Category	TRINITY ID	AGI code	LogFC	gene name	function
Lignan and lignin synthesis	DN27352_c0_g1_i1	At2g41480	9.39	ATPRX25	a cationic cell-wall-bound peroxidase homolog that is involved in the lignification of cell walls.
	DN3582_c1_g1_i5	At4g34230	4.93	ATCAD5	a catalytically active cinnamyl alcohol dehydrogenase which uses p-coumaryl aldehyde as a preferred substrate.
	DN4212_c0_g1_i2	At4g36220	4.55	CYP84A1	lignin biosynthetic process, oxidation-reduction process, phenylpropanoid biosynthetic process,
	DN5570_c0_g1_i4	At5g66390	4.31	PRX72	a peroxidase that is involved in lignin biosynthesis.
	DN14621_c0_g1_i1	At1g16490	4.01	ATMYB58	cell differentiation, lignin biosynthetic process
Terpenoid synthesis	DN4882_c0_g1_i2	At3g25810	11.91	Terpenoid cyclases	monoterpene biosynthetic process, terpenoid biosynthetic process
	DN20233_c0_g1_i2	At5g23960	9.2	ATTPS21	Encodes a sesquiterpene synthase
	DN375_c0_g4_i1	At1g61680	4.85	ATTPS14	monoterpene biosynthetic process, terpenoid biosynthetic process
	DN12310_c0_g1_i1	At1g78950	3.94	ATBAS	Terpenoid cyclases family protein, triterpenoid biosynthetic process
acyl-lipid metabolism	DN45714_c1_g1_i1	At4g25050	5.92	ATACP4	an acyl carrier protein predominantly expressed in leaves.
	DN26716_c0_g1_i5	AT1G72110	4.64	O-acyltransferase (WSD1-like) family protein	glycerolipid biosynthetic process, triglyceride biosynthetic process
	DN50597_c0_g1_i1	At5g49950	4.15	alpha/beta-Hydrolases superfamily protein	cellular lipid metabolic process
Phenylalanine, tyrosine and tryptophan biosynthesis	DN62877_c0_g1_i1	At1g22410	4.23	Class-II DAHP synthetase family protein	aromatic amino acid family biosynthetic process, chorismate biosynthetic process
	DN12752_c0_g2_i1	At3g06350	3.79	MEE32	Encodes a bi-functional dehydroquinate-shikimate dehydrogenase enzyme that catalyzes two steps in the chorismate biosynthesis pathway.
	DN6925_c0_g1_i1	At3g53260	3.7	ATPAL2	Encodes phenylalanine lyase, L-phenylalanine catabolic process, cinnamic acid biosynthetic process, defense response, phenylpropanoid biosynthetic process, response to karrikin, response to oxidative stress, response to wounding
Phenylpropanoid synthesis	DN65756_c0_g1_i2	At2g22990	5.44	SCPL8,	sinapoylglucose:malate sinapoyltransferase. Catalyzes the formation of sinapoylmalate from sinapoylglucose. Mutants accumulate excess sinapoylglucose.
	DN3319_c0_g1_i4	At1g48130	4.95	ATPER1	encodes a protein similar to the 1-cysteine (1-Cys) peroxiredoxin family of antioxidants.
	DN3582_c1_g1_i5	At4g34230	4.93	ATCAD5	Encodes a catalytically active cinnamyl alcohol dehydrogenase which uses p-coumaryl aldehyde as a preferred substrate.
Flavonol, Anthocyanin synthesis	DN1415_c0_g2_i1	At5g13930	14.77	ATCHS, TT4	Encodes chalcone synthase (CHS), a key enzyme involved in the biosynthesis of flavonoids. Required for the accumulation of purple anthocyanins in leaves and stems.
	DN77116_c0_g1_i1	At3g21560	8.2	BRT1	Encodes a protein with sinapic acid:UDP-glucose glucosyltransferase activity
	DN5577_c0_g1_i3	At5g23260	5.69	AGL32, TT16	Encodes a MADS box protein. Regulates proanthocyanidin biosynthesis in the inner-most cell layer of the seed coat.
	DN12333_c0_g2_i1	At5g35550	4.74	ATMYB123, TT2	TT2 encodes a R2R3 MYB domain putative transcription factor that acts as a key determinant in the proanthocyanidin accumulation of developing seed.
	DN4169_c0_g1_i1	At5g54010	4.51	UGT79B6
	DN546_c1_g1_i8	At5g07990	3.99	CYP75B1, TT7	Required for flavonoid 3' hydroxylase activity.
	DN12752_c0_g2_i1	At3g06350	3.79	MEE32	Encodes a bi-functional dehydroquinate-shikimate dehydrogenase enzyme that catalyzes two steps in the chorismate biosynthesis pathway.
Suberin synthesis (WAX)	DN5014_c0_g1_i10	At3g44540	5.09	FAR4	Encodes a member of the eight-member gene family encoding alcohol-forming fatty acyl-CoA reductases (FARs) identified in Arabidopsis thaliana.
	DN58529_c0_g1_i3	At4g34100	4.29	CER9, SUD1,	Encodes a protein involved in cuticular wax biosynthesis.

## Sheet: Plant hormone signal transducti
Category	TRINITY ID	AGI code	LogFC	gene name	function
JA signaling	DN5681_c0_g1_i2	At1g13280	7.59	AOC4	Encodes allene oxide cyclase. One of four genes in Arabidopsis that encode this enzyme, which catalyzes an essential step in jasmonic acid biosynthesis.
	DN3969_c1_g1_i3	At1g30135	4.71	JAZ8	defense response, regulation of defense response, regulation of jasmonic acid mediated signaling pathway, response to wounding
	DN7675_c0_g1_i4	At1g61340	4.5	ATFBS1	Encodes a F-box protein induced by various biotic or abiotic stress. response to 1-aminocyclopropane-1-carboxylic acid, response to abscisic acid, response to bacterium, response to jasmonic acid, response to osmotic stress, response to salicylic acid, response to salt stress, response to wounding
	DN1626_c0_g1_i1	At1g74950	4.37	JAZ2	defense response, regulation of defense response, regulation of jasmonic acid mediated signaling pathway, response to jasmonic acid, response to wounding
	DN134718_c0_g1_i1	At2g27690	5.19	CYP94C1	Encodes a CYP94C1. Has highest omega-hydroxylase activity with 9,10-epoxystearic acid, while also metabolized lauric acid (C12:0) and C18 unsaturated fatty acids. Gene expression is induced in response to wounding and jasmonic acid treatment.
	DN9534_c0_g1_i1	At2g43710	8.02	ATSSI2, FAB2	Encodes a stearoyl-ACP desaturase, involved in fatty acid desaturation. The ssi2 mutants have increased 18:0 and reduced 18:1 fatty acids. Exogenous application of glycerol to wild type plants mimics the ssi2 mutant phenotype. The altered 18:1 fatty acid content in the ssi2 mutants has an impact on SA- and JA-mediated defense signaling. ssi2 mutants resulted in hyper-resistance to green peach aph…
	DN5681_c0_g1_i3	At3g25780	7.68	AOC3	Encodes allene oxide cyclase, one of the enzymes involved in jasmonic acid biosynthesis.
	DN3607_c0_g1_i3	At3g50440	4.14	ATMES10	Encodes a protein shown to have methyl jasmonate esterase activity in vitro.
	DN7548_c0_g1_i1	At5g05600	6.02	JAO2, JOX2	Encodes a protein with similarity to flavonol synthases that is involved in the detoxifcation polycyclic aromatic hydrocarbons.
	DN77_c0_g1_i1	At5g07010	5.94	ARABIDOPSIS THALIANA SULFOTRANSFERASE 2A, ATST2A, ST2A, SULFOTRANSFERASE 2A	Encodes a sulfotransferase that acts specifically on 11- and 12-hydroxyjasmonic acid. Transcript levels for this enzyme are increased by treatments with jasmonic acid (JA), 12-hydroxyJA, JA-isoleucine, and 12-oxyphytodienoic acid (a JA precursor).
	DN981_c0_g1_i10	At5g13220	4.65	JAS1, JAZ10	defense response, regulation of defense response, regulation of jasmonic acid mediated signaling pathway, regulation of systemic acquired resistance, response to jasmonic acid, response to wounding
	DN1626_c0_g1_i4	At1g19180	4.18	ATJAZ1, JASMONATE-ZIM-DOMAIN PROTEIN 1, JAZ1, TIFY10A	defense response to bacterium, flower development, jasmonic acid mediated signaling pathway, pollen development, regulation of cellular response to alkaline pH, regulation of defense response, regulation of jasmonic acid mediated signaling pathway, response to jasmonic acid, response to wounding
	DN1626_c0_g1_i3	At1g74950	4.01	JASMONATE-ZIM-DOMAIN PROTEIN 2, JAZ2, TIFY10B	TIFY domain/Divergent CCT motif family protein;(source:Araport11)
Auxin sigaling	DN8764_c0_g1_i1	At1g04250	4.3	ATIAA17	auxin-activated signaling pathway, positive regulation of leaf senescence, regulation of transcription, DNA-templated, response to auxin
	DN9281_c0_g1_i2	At1g20925		PILS1, PIN-LIKES 1	Auxin efflux carrier family protein
	DN146929_c0_g1_i1	At1g53700	4.15	PK3AT, WAG 1	auxin polar transport, auxin-activated signaling pathway, cotyledon development, protein phosphorylation, regulation of growth, root development
	DN45939_c0_g1_i1	At2g14960	4.17	GH3.1	encodes a protein similar to IAA-amido synthases.
	DN60492_c0_g1_i1	At2g23170	3.87	GH3.3	encodes an IAA-amido synthase that conjugates Asp and other amino acids to auxin in vitro.
	DN52884_c0_g1_i1	At2g47260	5.16	ATWRKY23, WRKY DNA-BINDING PROTEIN 23, WRKY23	Encodes a member of WRKY Transcription Factor; Group I. Involved in nematode feeding site establishment and auxin mediated PIN polar localization in roots. Expression is induced by auxin.
	DN4933_c0_g1_i2	At5g47530	4.44	Auxin-responsive family protein
Ethylene signaling	DN1254_c1_g1_i1	At1g19210	3.81	ERF017, ERF17	encodes a member of the DREB subfamily A-5 of ERF/AP2 transcription factor family.
	DN25335_c0_g1_i1	At1g33760	5.36	ERF022, ETHYLENE RESPONSE FACTOR022	encodes a member of the DREB subfamily A-4 of ERF/AP2 transcription factor family.
	DN16888_c0_g3_i2	At2g19590	4.79	ATACO1	encodes a protein whose sequence is similar to 1-aminocyclopropane-1-carboxylate oxidase. cellular response to fatty acid, cellular response to iron ion, cellular response to nitric oxide, cellular response to potassium ion starvation, defense response, ethylene biosynthetic process, oxidation-reduction process.
	DN113400_c0_g1_i1	At2g44840	4.16	ATERF13	encodes a member of the ERF (ethylene response factor) subfamily B-3 of ERF/AP2 transcription factor family.
	DN143678_c0_g1_i1	At3g16770	3.82	ERF72, RAP2.3	ncodes a member of the ERF (ethylene response factor) subfamily B-2 of the plant specific ERF/AP2 transcription factor family (RAP2.3).
	DN2439_c0_g1_i1	At4g34410	3.87	ERF109, RRTF1	Encodes a member of the ERF (ethylene response factor) subfamily B-3 of ERF/AP2 transcription factor family.
	DN15574_c0_g2_i1	At3g61510	6.53	ACS1	ethylene biosynthetic process
	DN14177_c0_g1_i1	At4g11280	4	ATACS6	encodes a a member of the 1-aminocyclopropane-1-carboxylate (ACC) synthase (S-adenosyl-L-methionine methylthioadenosine-lyase, EC 4.4.1.14) gene family
ABA signaling	DN15048_c1_g1_i1	At1g65690	5.79	NDR1/HIN1-LIKE 6, NHL6	abscisic acid-activated signaling pathway, positive regulation of abscisic acid biosynthetic process, response to abscisic acid, response to osmotic stress, response to salt
	DN719_c0_g1_i9	At3g45640	4.32	ATMAPK3	abscisic acid-activated signaling pathway,
	DN2991_c0_g1_i7	At5g51990	4.84	CBF4, DREB1D	abscisic acid-activated signaling pathway,
	DN7701_c0_g1_i6	At5g59550	3.76	ATRDUF2	Encodes an ABA- and drought-induced RING-DUF1117 gene whose mutation results in hyposensitive phenotypes toward ABA in terms of germination rate and stomatal closure and markedly reduced tolerance to drought stress relative to wild-type plants.
	DN7799_c0_g1_i1	At5g64750	7.35	ABR1	Encodes a putative transcription factor containing an AP2 domain. Is a member of the ERF (ethylene response factor) subfamily B-4 of ERF/AP2 transcription factor family. Expressed in response to ABA, osmotic stress, sugar stress and drought.
cytokinin signaling	DN146531_c0_g1_i1	At1g78830	4.57	Curculin-like (mannose-binding) lectin family protein	Cytokinin responsive gene
	DN2571_c1_g1_i2	At3g22640	3.95	PAP85	cupin family protein, response to cytokinin
	DN7817_c1_g1_i1	At4g27950	4.41	CRF4	Encodes a member of the ERF (ethylene response factor) subfamily B-5 of ERF/AP2 transcription factor family.
	DN9796_c0_g1_i3	At5g56970	12.63	ATCKX3	encodes a protein whose sequence is similar to cytokinin oxidase/dehydrogenase, which catalyzes the degradation of cytokinins.
	DN15073_c0_g1_i1	At1g03430	8.79	AHP5	Encodes AHP5, one of the six Arabidopsis thaliana histidine phosphotransfer proteins (AHPs). AHPs function as redundant positive regulators of cytokinin signaling.
GA signaling	DN25333_c0_g1_i4	At1g14920	3.83	GAI, RGA2	gibberellic acid homeostasis, gibberellic acid mediated signaling pathway,
	DN10288_c0_g1_i1	At1g78440	4.82	ATGA2OX1	Encodes a gibberellin 2-oxidase that acts on C19 gibberellins.
	DN19166_c0_g1_i1	At2g36690	7.04	GAS2, GIM2	gibberellin biosynthetic process, oxidation-reduction process, response to abscisic acid
	DN21662_c1_g1_i1	At4g35390	8.78	AGF1, AHL25	AT-hook protein of GA feedback 1
	DN10981_c0_g1_i2	At5g65640	3.71	BETA HLH PROTEIN 93, BHLH093, NFL, NO FLOWERING IN SHORT DAY	bHLH093/NFL encodes a bHLH transcription factor involved in GA mediated control of flowering time.
	DN488_c0_g1_i4	At1g79460	3.82	ATKS1, GA2,	Encodes for a protein with ent-kaurene synthase B activity which catalyzes the second step in the cyclization of GGPP to ent-kaurene in the gibberellins biosynthetic pathway.

## Sheet: development
Category	TRINITY ID	AGI code	LogFC	gene name	function
floral development	DN82149_c1_g1_i2	At3g10390	3.68	FLD	histone deacetylation, oxidation-reduction process, positive regulation of flower development, vegetative to reproductive phase transition of meristem
	DN6830_c0_g1_i6	At3g58780	6.72	AGL1, SHP1	One of two genes (SHP1 and SHP2) that are required for fruit dehiscence. The two genes control dehiscence zone differentiation and promote the lignification of adjacent cells.
	DN27147_c2_g1_i1	At4g14900	9.32	FRIGIDA-like protein	cell differentiation, flower development
	DN11831_c0_g1_i3	At4g18960	13.85	AG, AGAMOUS	Floral homeotic gene encoding a MADS domain transcription factor. Specifies floral meristem and carpel and stamen identity.
	DN4146_c0_g1_i2	At5g01370	4.5	ACI1, ALC-INTERACTING PROTEIN 1, TON1 RECRUITING MOTIF 29, TRM29	ACI1 is mainly expressed in the vascular system. Involved in cell separation during fruit dehiscence.
	DN807_c0_g1_i7	At5g15800	12.84	AGL2, SEP1	Encodes a MADS box transcription factor involved flower and ovule development. Functionally redundant with SEP2 and SEP3.
	DN15477_c0_g1_i1	At5g57520	4.26	ATZFP2	negative regulation of floral organ abscission, regulation of transcription, DNA-templated
	DN807_c0_g1_i1	At3g02310	13.52	AGL4, SEP2	cell differentiation, flower development, multicellular organism development, plant ovule development, positive regulation of transcription by RNA polymerase II
	DN1799_c1_g1_i4	At1g24260	12.05	AGL9, SEP3	Member of the MADs box transcription factor family. SEP3 is redundant with SEP1 and 2. Flowers of SEP1/2/3 triple mutants show a conversion of petals and stamens to sepals.
	DN1983_c0_g1_i6	At1g69120	6.17	AGL7, AP1	loral homeotic gene encoding a MADS domain protein homologous to SRF transcription factors. Specifies floral meristem and sepal identity. Required for the transcriptional activation of AGAMOUS. Interacts with LEAFY.Binds to promoter and regulates the expression of flowering time genes SVP, SOC1 and AGL24.
	DN459_c0_g2_i4	AT5G60910	2.15	AGL8, FRUITFULL, FUL	flower development, fruit development, maintenance of inflorescence meristem identity,
	DN6033_c0_g1_i2	At5g61850	7.12	LEAFY, LFY, LFY3	Encodes transcriptional regulator that promotes the transition to flowering.Involved in floral meristem development. LFY is involved in the regulation of AP3 expression
vein development	DN1131_c0_g1_i2	At4g17350	4.38	FL5, FORKED-LIKE5	FORKED-LIKE family member, part of Group 3 (Group 1 consists of FKD1, FL1-FL3; Group 2 consists of FL4 and FL8 and Group 3 consists of FL5- FL7). May coordinate leaf size with vein density,
	DN6312_c0_g1_i1	At5g13180	5.12	NAC083, VNI2	Encodes a NAC domain transcription factor that interacts with VND7 and negatively regulates xylem vessel formation.
root hair or tricome or pollen tube	DN43928_c0_g1_i1	At3g20630	6.13	ATUBP14, DA3, PER1	Encodes a ubiquitin-specific protease. Identical to TTN6. Loss of function mutations are embryo lethals, having development arrested at the preglobular/globular stage. Also involved in root responses to phosphate deficiency.
	DN18580_c0_g3_i1	At4g20780	5.28	CML42	Calcium sensor involved in trichome branching.
	DN24438_c0_g1_i5	At5g35390	4.3	PRK1	Encodes a member of the receptor-like kinase family of genes. In pollen tubes, it accumulates in the plasma membrane of the apical growing tip through the process of exocytosis.
regeneration	DN56913_c0_g1_i4	At3g05540	4.72	TCTP2	Encodes TCTP2, a homolog of Translationally Controlled Tumor Protein. Enhances in vitro plant regeneration.
	DN2113_c1_g1_i1	At4g08150	8.97	KNAT1	cell fate commitment, cell fate specification, regulation of transcription, DNA-templated, xylem and phloem pattern formation, xylem development
	DN8999_c0_g2_i1	At1G70510	4.31	KNAT2	member of class I knotted1-like homeobox gene family (together with KNAT1). Similar to the knotted1 (kn1) homeobox gene of maize. KNAT2 acts synergistically with cytokinins and antagonistically with ethylene based on ectopic expression studies in different mutant backgrounds and hormone treatments.
	DN8999_c0_g3_i2	AT1G62360	11.75	STM, WAM1	Class I knotted-like homeodomain protein that is required for shoot apical meristem (SAM) formation during embryogenesis and for SAM function throughout the lifetime of the plant.
	DN955_c0_g1_i1	At1G23380	12.29	KNAT6	homeodomain transcription factor KNAT6, belonging to class I of KN transcription factor family (which also includes KNAT1 and KNAT2)
	DN13247_c0_g2_i5	At5g50100	6.65	DCC1	Encodes a putative thioredoxin DCC1 involved in determining shoot regeneration capacity.
regulation of meristem growth	DN1439_c1_g1_i1	At1g31320	3.68	LBD4	flowering stage, mature plant embryo stage, petal differentiation and expansion stage, plant embryo bilateral stage, plant embryo cotyledonary stage
	DN8952_c0_g1_i1	At3g27650	5.21	LBD25	flowering stage, mature plant embryo stage, petal differentiation and expansion stage, plant embryo bilateral stage, plant embryo cotyledonary stage
stomatal development	DN3532_c0_g1_i1	At1g04110	4.84	ATSDD1	Initially identified as a mutation affecting stomatal development and distribution. Encodes a protein similar to serine proteases.

## Sheet: abiotic stress
Category	TRINITY ID	AGI code	LogFC	gene name	function
abiotic stress	DN480_c0_g1_i3	At1g01470	6.02	ATLEA14, LSR3	Encodes late-embryogenesis abundant protein whose mRNA levels are induced in response to wounding and light stress. Might be involved in protection against desiccation.
	DN176_c1_g2_i2	At1g09970	5.69	LRR XI-23, RECEPTOR-LIKE KINASE 7, RLK7	protein autophosphorylation, response to oxidative stress, seed germination
	DN7752_c0_g1_i1	At1g12610	4.39	ATDDF1	Encodes a member of the DREB subfamily A-1 of ERF/AP2 transcription factor family (DDF1). The protein contains one AP2 domain. There are six members in this subfamily, including CBF1, CBF2, and CBF3. Overexpression of this gene results in delayed flowering and dwarfism, reduction of gibberellic acid biosynthesis, and increased tolerance to high levels of salt.
	DN49393_c0_g1_i4	At1g20440	4.2	COR47, RD17	cold acclimation, defense response to fungus, heat acclimation, response to abscisic acid, response to cold, response to osmotic stress, response to water deprivation
	DN71289_c0_g1_i1	At1g20450	5.1	ERD10	Encodes a gene induced by low temperature and dehydration. Inhibits e.coli growth while overexpressed. Belongs to the dehydrin protein family,
	DN38586_c0_g1_i2	At1g20620	3.87	ATCAT3, SEN2	cellular response to nitrogen starvation, cellular response to phosphate starvation, cellular response to sulfate starvation, hydrogen peroxide catabolic process, oxidation-reduction process, response to cadmium ion, response to cold, response to hydrogen peroxide, response to light stimulus, response to oxidative stress
	DN38586_c0_g1_i1	At1g20630	9.13	CAT1, CATALASE 1	cellular oxidant detoxification, cellular response to nitrogen starvation, cellular response to phosphate starvation, cellular response to sulfate starvation, hydrogen peroxide catabolic process, oxidation-reduction process, response to abscisic acid, response to cadmium ion, response to hydrogen peroxide, response to light stimulus
	DN387_c0_g1_i1	At5g52300	4.34	LTI65, RD29B	Encodes a protein that is induced in expression in response to water deprivation such as cold, high-salt, and desiccation.
	DN3569_c0_g1_i5	At1g21910	8.65	DREB26	cellular response to freezing, cellular response to heat, ethylene-activated signaling pathway, positive regulation of transcription, DNA-templated, response to jasmonic acid, response to salicylic acid
	DN41947_c0_g1_i2	At1g21980	4.06	ATPIP5K1, ATPIPK1, PHOSPHATIDYLINOSITOL-4-PHOSPHATE 5-KINASE 1, PIP5K1	ype I phosphatidylinositol-4-phosphate 5-kinase. Preferentially phosphorylates PtdIns4P. Induced by water stress and abscisic acid in Arabidopsis thaliana. Expressed in procambial cells of leaves, flowers and roots. A N-terminal Membrane Occupation and Recognition Nexus (MORN)affects enzyme activity and distribution.
	DN15675_c0_g1_i1	At1g22810	4.14	ATERF019, ERF019	cellular response to water deprivation, ethylene-activated signaling pathway, regulation of transcription, DNA-templated
	DN11346_c0_g1_i1	At1g29290	6.36	B-cell lymphoma 6 protein	cellular response to nitrogen starvation, multicellular organism development, response to carbon dioxide, response to osmotic stress
	DN706_c1_g1_i1	At1g35910	5.75	ATTPPD	response to osmotic stress, response to oxidative stress, response to salt stress, trehalose biosynthetic process
	DN1062_c0_g1_i12	At1g54050	3.82	HSP20-like chaperones superfamily protein	protein complex oligomerization, protein folding, response to heat, response to high light intensity, response to hydrogen peroxide, response to reactive oxygen species, response to salt stress
	DN1908_c0_g1_i17	At1g54410	4.38	ATHIRD11	negative regulation of hydrogen peroxide biosynthetic process
	DN11634_c0_g1_i1	At1g54850	3.88	HSP20-like chaperones superfamily protein
	DN184_c0_g1_i4	At1g56600	5.14	ATGOLS2	galactose metabolic process, response to abscisic acid, response to cold, response to oxidative stress, response to salt stress, response to water deprivation
	DN980_c0_g1_i3	At1g59960	11.79	NAD(P)-linked oxidoreductase superfamily protein	oxidation-reduction process, response to salt stress
	DN96117_c0_g1_i1	At1g60190	4.65	ATPUB19	Encodes PUB19, a plant U-box armadillo repeat protein. Involved in salt inhibition of germination together with PUB18. The mRNA is cell-to-cell mobile.
	DN7675_c0_g1_i4	At1g61340	4.5	ATFBS1	Encodes a F-box protein induced by various biotic or abiotic stress.
	DN9465_c0_g1_i4	At1g76180	4.5	ERD14	cold acclimation, response to abscisic acid, response to cold, response to desiccation, response to water deprivation
	DN4168_c0_g1_i10	At1g77120	4.11	ADH1	cellular respiration, formaldehyde catabolic process, oxidation-reduction process, positive regulation of cellular response to hypoxia, response to abscisic acid, response to cadmium ion, response to caffeine, response to cold, response to estradiol, response to flooding, response to hydrogen peroxide, response to hypoxia, response to osmotic stress, response to salt stress, response to sucrose, …
	DN706_c1_g1_i2	At1g78090	5.69	ATTPPB	trehalose biosynthetic process
	DN14277_c0_g1_i12	At2g01450	5.85	ATMPK17	MPK17 Map kinase family member. Mutants have increased numbers of peroxisomes a phenotype that can be suppressed by mutations in PMD1. This and other treatments, suggests a function in control of peroxisome proliferation in salt stress.
	DN5715_c0_g1_i1	At2g17840	5.82	ERD7	Identified as drought-inducible gene by differential hybridization. Upregulated by high light, drought, cold and salt stress determined by microarray analysis.
	DN4207_c0_g1_i8	At2g21660	5.07	ATGRP7, CCR2	Encodes a small glycine-rich RNA binding protein that is part of a negative-feedback loop through which AtGRP7 regulates the circadian oscillations of its own transcript. Gene expression is induced by cold. GRP7 appears to promote stomatal opening and reduce tolerance under salt and dehydration stress conditions, but, promotes stomatal closing and thereby increases stress tolerance under conditio…
	DN7304_c0_g1_i3	At2g22960	3.79	FPT2	Encodes a putative flavonol-phenylacyltransferase. Some accessions (e.g. C24) contain a full length protein that produces high levels of saiginols compared to Col which is non producing. The producer strains also appear to be more resistant to UV-B irradiation
	DN4726_c0_g1_i1	At2g25900	4.67	ATCTH, ATTZF1	Encodes a protein with two tandem-arrayed CCCH-type zinc fingers that binds RNA and is involved in RNA turnover. The mRNA is cell-to-cell mobile.
	DN6461_c0_g1_i8	At2g25940	6.01	AEP1, ALPHA-VPE	Encodes a vacuolar processing enzyme belonging to a novel group of cysteine proteinases that is expressed in vegetative organs and is upregulated in association with various types of cell death and under stressed conditions.
	DN14621_c0_g1_i2	At2g31180	4.29	ATMYB14	cell differentiation, positive regulation of transcription, DNA-templated, response to auxin, response to cold, response to ethylene, response to freezing, response to jasmonic acid, response to salicylic acid, response to salt stress
	DN146666_c0_g1_i1	At2g32120	3.83	HSP70T-2	cellular response to heat, cellular response to unfolded protein, chaperone cofactor-dependent protein refolding, protein folding, protein refolding, response to heat, response to high light intensity, response to hydrogen peroxide, response to unfolded protein
	DN17247_c0_g2_i1	At5g62020	3.72	HSFB2A	member of Heat Stress Transcription Factor (Hsf) family, cellular response to heat, positive regulation of transcription from RNA polymerase II promoter in response to heat stress, response to chitin
	DN19382_c0_g1_i1	At2g22880	4.81	VQ12	response to UV-B
	DN184_c0_g1_i6	At2g47180	4.65	ATGOLS1	GolS1 is a galactinol synthase that catalyzes the formation of galactinol from UDP-galactose and myo-inositol. GolS1 transcript levels rise in response to methyl viologen, an oxidative damage-inducing agent. Plants over-expressing GolS1 have increased tolerance to salt, chilling, and high-light stress.
	DN17519_c0_g1_i2	At2g47190	7.11	ATMYB2,	Encodes a MYB transcription factor that possesses an R2R3 MYB DNA binding domain and is known to regulate the expression of salt- and dehydration-responsive genes. Has been shown to bind calmodulin.
	DN86064_c0_g1_i1	At5g47550	5.2	CYS5	Putative phytocystatin expressed in seedlings and induced by heat stress and abscisic acid. Overexpression increases germination rate and heat stress tolerance. CYS5 is a target of ABF1 and ABF3 transcriptional regulators which bind to its promoter.
	DN12167_c0_g1_i1	At3g03270	3.84	HRU1	HRU1 is a hypoxia induced universal stress protein. It exists as two splice variants with AT3G03270.2 , which contains a putative dimerization domain, the predominant transcript found under anoxia.
	DN352_c0_g1_i6	At3g05550	3.82	ATHIGD3	Hypoxia-responsive family protein
	DN29405_c0_g1_i1	At3g09390	4.36	ATMT-1, MT2A	metallothionein, binds to and detoxifies excess copper and other metals, limiting oxidative damage
	DN5003_c0_g1_i1	At3g09640	4.27	APX1B, APX2	cellular response to oxidative stress, hydrogen peroxide catabolic process, oxidation-reduction process, response to oxidative stress, response to reactive oxygen species
	DN40724_c0_g1_i1	At3g12580	11.66	ATHSP70	cellular response to heat, cellular response to unfolded protein, chaperone cofactor-dependent protein refolding, protein folding, protein refolding, protein ubiquitination, response to bacterium, response to cadmium ion, response to heat, response to high light intensity, response to hydrogen peroxide, response to temperature stimulus, response to unfolded protein, response to virus
	DN11282_c0_g1_i1	At3g22490	5.35	ATRAB28	response to abscisic acid, response to osmotic stress, response to water deprivation
	DN8863_c0_g1_i4	At3g24500	4.67	ATMBF1C	ethylene-activated signaling pathway, positive regulation of transcription, DNA-templated, response to abscisic acid, response to heat, response to water deprivation
	DN19151_c0_g1_i1	At3g28210	4.82	PMZ, SAP12	response to abscisic acid, response to chitin
	DN10121_c0_g2_i1	At4g15480	3.77	UGT84A1	Encodes a protein that might have sinapic acid:UDP-glucose glucosyltransferase activity. response to UV-B, response to toxic substance
	DN31004_c0_g1_i12	At4g21100	4.34	DDB1B	DNA repair, embryo development ending in seed dormancy, proteasome-mediated ubiquitin-dependent protein catabolic process, protein ubiquitination, red, far-red light phototransduction
	DN146856_c0_g1_i1	At4g25470	6.16	ATCBF2, DREB1C	cold acclimation, regulation of transcription, DNA-templated, response to cold
	DN7618_c0_g2_i1	At4g27410	4.1	ANAC072, ATRD26,	positive regulation of transcription, DNA-templated, regulation of transcription, DNA-templated, response to abscisic acid, response to water deprivation
	DN8930_c0_g1_i2	At5g13170	4.83	ATSWEET15, SAG29,	carbohydrate transport, cellular response to abscisic acid stimulus, cellular response to osmotic stress, cellular response to salicylic acid stimulus, embryo development ending in seed dormancy, leaf senescence, seed maturation, sucrose transport
	DN430_c0_g1_i3	At5g40010	4.18	AATP1, ASD	fruit development, response to abscisic acid, response to cold, response to salt stress, response to water deprivation, seed maturation
	DN387_c0_g1_i2	At5g52300	3.69	LTI65, RD29B	Encodes a protein that is induced in expression in response to water deprivation such as cold, high-salt, and desiccation.
	DN13868_c0_g1_i1	At5g24110	6.5	ATWRKY30	leaf senescence, regulation of transcription, DNA-templated, response to hydrogen peroxide, response to ozone, response to salicylic acid

## Sheet: plant-pathogen interaction
Category	TRINITY ID	AGI code	logFC	gene name	function
Plant-pathogen interaction	DN18172_c0_g2_i1	At1g20030	4.57	Pathogenesis-related thaumatin superfamily protein	defense response
	DN44446_c0_g1_i2	At1g12220	5.04	RPS5	cell death, defense response, defense response to bacterium, incompatible interaction, plant-type hypersensitive response
	DN4721_c0_g1_i1	At1g17860	4.54	ATKTI5	response to insect
	DN48078_c0_g1_i7	At3g45420	6.05	L-TYPE LECTIN RECEPTOR KINASE I.4, LECRK-I.4	defense response, defense response to bacterium, defense response to oomycetes, protein phosphorylation
	DN10699_c0_g1_i5	At2g38470	5.74	ATWRKY33, WRKY DNA-BINDING PROTEIN 33, WRKY33	Regulates the antagonistic relationship between defense pathways mediating responses to P. syringae and necrotrophic fungal pathogens. Located in nucleus. Involved in response to various abiotic stresses - especially salt stress.
	DN719_c0_g1_i9	At3g45640	4.32	ATMAPK3, ATMPK3, MITOGEN-ACTIVATED PROTEIN KINASE 3, MPK3	Encodes a mitogen-activated kinase whose mRNA levels increase in response to touch, cold, salinity stress and chitin oligomers.
	DN1437_c0_g2_i1	At4g19840	5.96	AN5, PP2-A1	encodes a phloem lectin, similar to phloem lectin in cucumber and celery. Gene is expressed in the phloem, predominantly in the companion cells.
	DN13484_c0_g1_i1	At4g19850	4	AN3, PP2A2
	DN134771_c0_g1_i1	At2g28710	4.96	C2H2-type zinc finger family protein	regulation of transcription, DNA-templated, response to chitin
	DN12709_c0_g1_i1	At5g42380	6.59	ATCML37	functions as a positive regulator in Ca(2+) signaling during herbivory, connecting Ca(2+) and jasmonate signaling.
	DN101236_c0_g1_i1	At2g27880	4.55	ATAGO5	Required for antiviral RNA silencing.Confers resistance to Potato virus X.
	DN17751_c0_g1_i1	At3g50930	4.08	ATBCS1, ATOM66	Encodes a protein that is present in a homo-multimeric protein complex on the outer mitochondrial membrane and plays a role in cell death and amplifying salicylic acid signalling.
	TRINITY_DN32_c2_g1_i4	At1g08320	4.98	BZIP21, TGA9	anther development, hydrogen peroxide mediated signaling pathway, regulation of transcription, DNA-templated, response to molecule of bacterial origin, transcription, DNA-templated
	DN11156_c0_g1_i1	At5g47910	4.89	ATRBOHD	carbohydrate homeostasis, defense response, defense response to fungus, negative regulation of programmed cell death, osmosensory signaling pathway, oxidation-reduction process, reactive oxygen species metabolic process, response to heat, response to wounding
	DN699_c0_g2_i14	At5g40990	4.88	GLIP1	defense response to bacterium, defense response to fungus, defense response to fungus, incompatible interaction, induced systemic resistance, ethylene mediated signaling pathway, jasmonic acid and ethylene-dependent systemic resistance, ethylene mediated signaling pathway, lipid catabolic process, response to fungus, response to salicylic acid, systemic acquired resistance
	DN3605_c0_g1_i3	At5g52020	3.96	a member of the DREB subfamily A-4	defense response to fungus, ethylene-activated signaling pathway, glucosinolate metabolic process, regulation of transcription, DNA-templated
	DN6257_c1_g1_i1	At5g52450	8.32	MATE efflux family protein	drug transmembrane transport, response to nematode
	DN10108_c0_g1_i1	At5g49520	4.37	ARABIDOPSIS THALIANA WRKY DNA-BINDING PROTEIN 48, ATWRKY48, WRKY DNA-BINDING PROTEIN 48, WRKY48	Encodes WRKY48, a member of the WRKY Transcription Factor. WRKY48 is a stress- and pathogen-induced transcriptional activator that represses plant basal defense.
	DN135562_c0_g1_i1	At5g37490	4.67	ARM repeat superfamily protein	protein ubiquitination, response to chitin
	DN3906_c1_g1_i1	At3g48990	6.17	AAE3	defense response to fungus, oxalate catabolic process, positive regulation of seed germination, response to cadmium ion, response to cytokinin, seed coat development
	DN7417_c0_g1_i1	At2g30020	4.13	AP2C1	abscisic acid-activated signaling pathway, defense response to fungus, protein dephosphorylation, response to fungus, response to wounding
	DN2825_c0_g1_i9	At5g26920	4.96	CBP60G	cellular response to hypoxia, defense response to bacterium, incompatible interaction, regulation of salicylic acid biosynthetic process, regulation of systemic acquired resistance, response to bacterium, response to molecule of bacterial origin, salicylic acid biosynthetic process
	DN71115_c0_g1_i5	At1g75040	3.72	PR-5	Thaumatin-like protein involved in response to pathogens. mRNA level of the PR-5 gene (At1g75040)is significantly changed after cutting the inflorescence stem indicating the existence of a network of signal transducing pathways as other stress-regulated genes (At5g01410, At3g17800, At1g29930)do not response to the treatment. The mRNA is cell-to-cell mobile.
	DN26073_c0_g1_i1	At4g23160	12.1	CRK8	defense response to bacterium, protein phosphorylation
	DN17445_c0_g1_i2	At4g10490	7.1	DLO2,	defense response to oomycetes, oxidation-reduction process
	DN13112_c0_g1_i1	At5g05300	5.8	IDL6	induced in response to Pathogen-Associated Molecular Patterns (PAMPs). Overexpression of IDL6 results in increased susceptibility to pathogens.
	DN4811_c0_g1_i2	At3g55840	3.82	Hs1pro-1 protein	defense response, tryptophan catabolic process to kynurenine
	DN4357_c0_g1_i1	At3g12500	5.26	ATHCHIB, PR-3	encodes a basic chitinase involved in ethylene/jasmonic acid mediated signalling pathway during systemic acquired resistance based on expression analyses.
	DN170_c0_g3_i1	At4g12560	9.71	CPR1	Encodes CPR1 (Constitutive Expresser of PR Genes 1, also known as CPR30), a F-Box protein that functions as a negative regulator of defense response and targets resistance proteins.
	DN2227_c0_g1_i1	At5g21090	8.18	Leucine-rich repeat (LRR) family protein	defense response, signal transduction
	DN9534_c0_g1_i1	At2g43710	8.02	ATSSI2, FAB2	defense response, defense response to bacterium, defense response to insect, defense response to virus, fatty acid biosynthetic process, fatty acid metabolic process, jasmonic acid biosynthetic process, lipid biosynthetic process, oxidation-reduction process, regulation of jasmonic acid mediated signaling pathway, regulation of salicylic acid mediated signaling pathway, unsaturated fatty acid bio…
	DN16585_c0_g1_i2	At4g39980	4.07	ATDAHP1, DAHP1	Encodes a 2-deoxy-D-arabino-heptulosonate 7-phosphate (DAHP) synthase, which catalyzes the first committed step in aromatic amino acid biosynthesis. Gene expression is induced by wounding and pathogenic bacteria Pseudomonas syringae.
	DN9814_c0_g1_i3	At1g12663	4.28	PR (pathogenesis-related) protein	Belongs to the plant thionin (PR-13) family
	DN12861_c0_g1_i1	At5g06320	4.51	NDR1, NHL3	defense response to bacterium, defense response to bacterium, incompatible interaction, defense response to virus, response to bacterium, response to salicylic acid, response to wounding
	DN7463_c0_g1_i2	At3g14460	5.39	LRRAC1	Leucine rich repeat protein that also contains an adenylate cyclase catalytic core motif. Capable of converting ATP to cAMP in vitro. Mutants show increased susceptibility to fungal pathogens.
	DN5683_c0_g2_i2	At3g44350	4.8	ANAC061	regulation of transcription, DNA-templated, response to chitin
	DN50346_c0_g1_i4	At3g04740	4.43	ATMED14, SWP	Regulates Defense Gene Expression in Plant Immune Responses
	DN72_c1_g2_i1	At1g24140	4.27	AT3-MMP	Matrix metalloproteinases operate redundantly in Arabidopsis immunity against necrotrophic and biotrophic fungal pathogens
	DN11110_c0_g1_i1	At3g14470	5.58	NB-ARC domain-containing disease resistance protein	defense response
	DN16486_c0_g1_i1	At2g05940	5.33	RIPK	Encodes a receptor-like cytoplasmic kinase that phosphorylates the host target RIN4, leading to the activation of a plant innate immune receptor RPM1.
	DN14780_c0_g4_i1	At3g48990	5.25	AAE3, ACYL-ACTIVATING ENZYME 3	Encodes an oxalyl-CoA synthetase and is required for oxalate degradation, for normal seed development, and for defense against an oxalate-producing fungal pathogen.
	DN10741_c0_g1_i8	At3g16030	4.21	CALLUS EXPRESSION OF RBCS 101, CES101, RESISTANCE TO FUSARIUM OXYSPORUM 3, RFO3	innate immune response, protein phosphorylation, response to fungus
	DN83741_c0_g1_i1	At2g28790	5.62	Pathogenesis-related thaumatin superfamily protein	defense response
	DN134687_c0_g1_i1	At3g50930	4.64	ATBCS1, OM66	cell death, plant-type hypersensitive response, response to UV, response to bacterium, response to molecule of bacterial origin, salicylic acid mediated signaling pathway
	DN19289_c0_g2_i2	At1g69550	4.34	TIR-NBS-LRR class disease resistance protein
	DN2313_c0_g1_i2	At3g11480	5.81	ATBSMT1, BSMT1	encodes a SABATH methyltransferase that methylates both salicylic acid and benzoic acid. It is highly expressed in flowers, induced by biotic and abiotic stress and thought to be involved in direct defense mechanism.
	DN104059_c0_g1_i1	At3g11840	5.62	PUB24	acts as a negative regulator of PAMP-triggered immunity.
	DN42728_c0_g1_i1	At1g18570	3.8	ATMYB51	Encodes a member of the R2R3-MYB transcription family. Involved in indole glucosinolate biosynthesis.
	DN5253_c0_g1_i2	At1g80840	4.31	ATWRKY40	defense response to bacterium, defense response to fungus, negative regulation of transcription, DNA-templated, regulation of defense response, regulation of defense response to virus by host, response to chitin, response to molecule of bacterial origin, response to salicylic acid, response to wounding
	DN95025_c0_g1_i1	At1g70170	4.71	AT2-MMP	operates redundantly in Arabidopsis immunity against necrotrophic and biotrophic fungal pathogens
	DN1689_c0_g2_i1	At2g46240	5.81	ATBAG6	autophagy, defense response to fungus, induction of programmed cell death, positive regulation of autophagy, protein folding, response to heat, response to high light intensity, response to hydrogen peroxide, vegetative to reproductive phase transition of meristem
	DN48078_c0_g1_i7	At3g45420	6.05	LECRK-I.4	defense response, defense response to bacterium, defense response to oomycetes, protein phosphorylation
	DN2313_c0_g1_i2	At3g11480	5.81	ATBSMT1, BSMT1	encodes a SABATH methyltransferase that methylates both salicylic acid and benzoic acid. It is highly expressed in flowers, induced by biotic and abiotic stress and thought to be involved in direct defense mechanism.
	DN5471_c0_g1_i2	At5g52640	4.48	ATHS83, ATHSP90-1	nteracts with disease resistance signaling components SGT1b and RAR1 and is required for RPS2-mediated resistance.
	DN8777_c0_g1_i1	At5g24090	3.76	ATCHIA, LYS1	Chitinase A (class III) expressed exclusively under environmental stress conditions. Shown be a plant lysozyme involved in plant immunity.
	DN10788_c0_g1_i2	At3g54420	3.72	ATCHITIV, ATEP3	cell wall macromolecule catabolic process, chitin catabolic process, defense response, plant-type hypersensitive response, polysaccharide catabolic process, response to bacterium, response to wounding, somatic embryogenesis
	DN7875_c0_g1_i6	At2g24300	4.45	Calmodulin-binding protein	regulation of salicylic acid biosynthetic process
	DN125547_c0_g1_i1	At2g39210	5.17	Major facilitator superfamily protein	defense response to fungus, transmembrane transport
	DN4811_c0_g1_i3	At2g40000	3.93	ATHSPRO2, HSPRO2	defense response to bacterium, incompatible interaction, response to oxidative stress, response to salicylic acid, tryptophan catabolic process to kynurenine
	DN26069_c0_g1_i2	At2g43700	3.74	LECRK-V.4	Concanavalin A-like lectin protein kinase family protein

## Sheet: protein synthesis
Category	TRINITY ID	AGI code	logFC	gene name	function
protein folding	DN31994_c0_g1_i1	At2g21130	3.99	Cyclophilin-like peptidyl-prolyl cis-trans isomerase family protein	protein peptidyl-prolyl isomerization, protein refolding
	DN77463_c0_g1_i1	At3g44110	3.95	ATJ3	homologous to the co-chaperon DNAJ protein from E coli
	DN24834_c0_g1_i1	At4g27670	5.05	HSP21	chloroplast organization, regulation of transcription, DNA-templated, response to heat, response to high light intensity, response to hydrogen peroxide, response to light stimulus
	DN40724_c0_g1_i2	At5g02500	7.85	ATHSP70-1	cellular response to heat, cellular response to unfolded protein, chaperone cofactor-dependent protein refolding, defense response to bacterium, defense response to fungus, defense response to other organism, negative regulation of seed germination, protein folding, protein refolding, response to cadmium ion, response to cold, response to heat, response to unfolded protein, response to virus, sto…
	DN15339_c0_g1_i1	At5g37380	5.55	Chaperone DnaJ-domain superfamily protein
	DN5471_c0_g1_i2	At5g52640	4.48	ATHS83, ATHSP90-1	cellular response to heat, chaperone-mediated protein folding, defense response to bacterium, defense response to bacterium, incompatible interaction, protein folding, protein stabilization, response to arsenic-containing substance, response to heat
	DN1062_c0_g1_i12	At1g54050	3.82	HSP20-like chaperones superfamily protein	protein complex oligomerization, protein folding, response to heat, response to high light intensity, response to hydrogen peroxide, response to reactive oxygen species, response to salt stress
	DN40724_c0_g1_i1	At3g12580	11.66	ATHSP70	cellular response to heat, cellular response to unfolded protein, chaperone cofactor-dependent protein refolding, protein folding, protein refolding, protein ubiquitination, response to bacterium, response to cadmium ion, response to heat, response to high light intensity, response to hydrogen peroxide, response to temperature stimulus, response to unfolded protein, response to virus
	DN6058_c0_g1_i1	At4g10250	4.7	ATHSP22.0	protein complex oligomerization, protein folding, response to heat, response to hydrogen peroxide, response to reactive oxygen species, response to salt stress
	DN24834_c0_g1_i1	At4g27670	5.05	HSP21	chloroplast organization, regulation of transcription, DNA-templated, response to heat, response to high light intensity, response to hydrogen peroxide, response to light stimulus
	DN37938_c0_g1_i3	At5g12020	6.01	HSP17.6II	protein complex oligomerization, protein folding, response to heat, response to high light intensity, response to hydrogen peroxide, response to reactive oxygen species, response to salt stress
	DN5471_c0_g1_i2	At5g52640	4.48	ATHS83, ATHSP90-1	Encodes a cytosolic heat shock protein AtHSP90.1. AtHSP90.1 interacts with disease resistance signaling components SGT1b and RAR1 and is required for RPS2-mediated resistance
Ribosomal protein	DN70792_c0_g1_i1	At2g32060	6.62	Ribosomal protein L7Ae/L30e/S12e/Gadd45 family protein	cytosolic ribosome, cytosolic small ribosomal subunit, nucleus, peroxisome
	DN12079_c0_g1_i6	At3g47370	4.46	Ribosomal protein S10p/S20e family protein	cytosolic ribosome, cytosolic small ribosomal subunit
	DN45948_c0_g1_i1	At3g61110	8.12	ARS27A	ribosomal small subunit assembly
	DN5021_c0_g1_i4	At4g31985	5.02	ribosomal protein S18C	encodes a ribosomal protein S18C, a constituent of the small subunit of the ribosomal complex
	DN73782_c0_g1_i2	At5g03850	8.86	Nucleic acid-binding, OB-fold-like protein	Ribosomal protein S28e
	DN71829_c0_g1_i1	At5g56670	9.24	Ribosomal protein S30 family protein	cytoplasm, cytosolic small ribosomal subunit, plastid
	DN67114_c0_g1_i1	At5g57290	3.86	60S acidic ribosomal protein family	structural constituent of ribosome
protease	DN1649_c0_g1_i2	At1g09750	3.68	Eukaryotic aspartyl protease family protein	protein catabolic process, proteolysis, systemic acquired resistance
	DN10522_c0_g1_i1	At1g11080	5.52	SCPL31	proteolysis involved in cellular protein catabolic process
	DN72_c1_g2_i1	At1g24140	4.27	AT3-MMP	extracellular matrix organization, proteolysis
	DN8455_c0_g1_i2	At1g33540	4.24	SCPL18	proteolysis, extracellular region

## Sheet: Cell Wall
Category	TRINITY ID	AGI code	logFC	gene name	function
cell wall	DN716_c0_g4_i1	At1g11330	11.15	RDA2, SD1-13	S-locus lectin protein kinase family protein
	DN24813_c0_g1_i5	At1g32180	5.33	ATCSLD6	cellulose synthase-like D6
	DN94312_c0_g1_i3	At1g75680	4.19	ATGH9B7	glycosyl hydrolase 9B7
	DN10994_c0_g1_i3	At1g76160	4.79	SKS5, SKU5 SIMILAR 5	oxidation-reduction process
	DN16477_c0_g3_i1	At2g06850	3.66	EXGT-A1,XTH4	xyloglucan endotransglucosylase/hydrolase 4
	DN10608_c0_g1_i2	At2g41640	4.06	Glycosyltransferase family 61 protein	transferase activity, transferring glycosyl groups
	DN10846_c0_g1_i1	At3g01190	8.37	Peroxidase superfamily protein	hydrogen peroxide catabolic process, oxidation-reduction process, response to oxidative stress
	DN17809_c1_g1_i1	At3g09520	4.62	ATEXO70H4	exocytosis, protein transport
	DN151_c0_g3_i2	At3g13790	4.24	ATCWI1, ATCWINV1, CWI1	carbohydrate metabolic process, defense response to fungus, response to karrikin,response to wounding
	DN7073_c0_g1_i2	At3g14040	4.71	Pectin lyase-like superfamily protein	carbohydrate metabolic process, cell wall organization
	DN357_c0_g1_i2	At1g02800	4.28	ATCEL2, CELLULASE 2	cell wall organization, cellulose catabolic process, pattern specification process, response to nematode
	DN11692_c1_g3_i1	At3g28340	4.73	GATL10, GOLS8	cell wall organization, pectin biosynthetic process, response to oxidative stress
	DN4294_c0_g1_i9	At3g45970	4.52	ATEXLA1	plant-type cell wall loosening, unidimensional cell growth
	DN12832_c0_g1_i2	At3g60730	5.59	Plant invertase/pectin methylesterase inhibitor superfamily	cell wall modification, pectin catabolic process
	DN357_c0_g1_i3	At4g02290	3.93	ATGH9B13	cell wall organization, cellulose catabolic process
	DN7073_c0_g1_i3	At4g18180	4.79	Pectin lyase-like superfamily protein
	DN25333_c0_g1_i2	At4g18780	4.87	ATCESA8, LEW2	cellulose synthase (UDP-forming) activity
	DN9219_c0_g3_i7	At4g25240	4.53	SKS1, SKU5 SIMILAR 1	oxidation-reduction process
	DN10048_c0_g1_i1	At4g25810	4.1	XTH23, XTR6	cell wall biogenesis, cell wall organization, xyloglucan metabolic process
	DN2010_c3_g1_i2	At4g33440	5.26	Pectin lyase-like superfamily protein	carbohydrate metabolic process, cell wall organization
	DN4294_c0_g2_i1	At4g38400	4.94	ATEXLA2, ATEXPL	plant-type cell wall loosening, sexual reproduction, unidimensional cell growth
	DN702_c1_g2_i1	At5g16910	4.88	ATCSLD2	cell wall organization, cellulose biosynthetic process, plant-type primary cell wall biogenesis, response to cold, root hair elongation
	DN5169_c0_g1_i1	At5g53250	4.09	ATAGP22	anchored component of membrane, plasma membrane
	DN3606_c0_g1_i2	At5g57550	6.35	XTH25, XTR3	cell wall organization, plant-type cell wall biogenesis, xyloglucan metabolic process
	DN7067_c0_g1_i7	At5g57560	6.26	ATXTH22, TCH4, TOUCH 4	cell wall biogenesis, plant-type cell wall organization, response to auxin, response to brassinosteroid, response to cold, response to heat, response to mechanical stimulus, xyloglucan metabolic process
	DN6287_c0_g1_i1	At5g24318	9.97	O-Glycosyl hydrolases family 17 protein	plant cell wall synthesis
	DN27352_c0_g1_i1	AT2G41480	9.39	PEROXIDASE 25, ATPRX25	cellular oxidant detoxification, hydrogen peroxide catabolic process, lignin metabolic process, oxidation-reduction process, plant-type cell wall organization, response to oxidative stress

## Sheet: transport
Category	TRINITY ID	AGI code	logFC	gene name	function
Transport	DN2786_c0_g1_i5	At1g08440	9.61	aluminum activated malate transporter family protein	malate transport
	DN13445_c0_g1_i1	At1g29300	4.8	UNE1, UNFERTILIZED EMBRYO SAC 1	intracellular protein transporter, putative
	DN11640_c0_g1_i3	At2g38290	6.01	AMMONIUM TRANSPORTER 2, AMMONIUM TRANSPORTER 2;1, AMT2, AMT2;1, ATAMT2	a high-affinity ammonium transporter,
	DN24559_c0_g1_i1	At2g39510	6.24	UMAMIT14, USUALLY MULTIPLE ACIDS MOVE IN AND OUT TRANSPORTERS 14	L-glutamate import across plasma membrane
	DN250_c0_g1_i4	At5g63850	5.04	AAP4, AMINO ACID PERMEASE 4	amino acid transmembrane transport
	DN582_c0_g1_i1	At4g01470	4.65	ATTIP1.3, GAMMA-TIP3, TIP1;3, TONOPLAST INTRINSIC PROTEIN 1;3	functions as water and urea channels in pollen.
	DN250_c0_g1_i5	At1g77380	4.6	ATAAP3	Amino acid permease which transports basic amino acids.
	DN12075_c0_g1_i1	At3g07600	4.52	Heavy metal transport/detoxification superfamily protein
	DN10029_c0_g2_i1	At3g12750	9.64	ATZIP1	response to zinc ion, zinc ion transmembrane transport, zinc ion transport
	DN5672_c1_g1_i2	At4g39700	5.05	Heavy metal transport/detoxification superfamily protein
	DN1697_c1_g1_i5	At1g22710	3.83	ATSUC2, SUT1	a high-affinity transporter essential for phloem loading and long-distance transport
	DN19017_c2_g1_i1	At2g22500	4.58	ATPUMP5, DIC1, DICARBOXYLATE CARRIER 1, PLANT UNCOUPLING MITOCHONDRIAL PROTEIN 5, UCP5, UNCOUPLING PROTEIN 5	Encodes one of the mitochondrial dicarboxylate carriers
	DN1430_c0_g1_i2	At4g10850	3.87	ATSWEET7	carbohydrate transport
	DN51983_c0_g1_i1	At1g10180	4.08	EXO84C	OW protein: exocyst complex component-like protein
	DN24235_c0_g1_i1	At2g45960	6.55	ATHH2, NAMED PLASMA MEMBRANE INTRINSIC PROTEIN 1;2, PIP1;2, PIP1B, PLASMA MEMBRANE INTRINSIC PROTEIN 1B, TMP-A, TRANSMEMBRANE PROTEIN A	a member of the plasma membrane intrinsic protein subfamily PIP1. localizes to the plasma membrane and exhibits water transport activity in Xenopus oocyte. expressed ubiquitously and protein level decreases slightly during leaf development
